# Supplementary material
Source: publisher figshare collection journal article supplement (https://gsapubs.figshare.com/ndownloader/files/22410099)
Supplement: Supplementary file 1 [file 22410099]

Archive with 11 entries (11 files):
- GIS_FAULTS_shapefile.zip
- NEOTECTONIC_DATA.xlsm
- Paleoeq_catalog.kmz
- Paleoeq_catalog.xlsx
- Recurrence_intervals.xlsx
- Slip-rates.xlsx
- Supplemental References Cited.docx
- Displacements_per_event.xlsx
- FigureS1.pdf
- GIS_FAULTS.kmz
- GIS_FAULTS_attributes_description.docx
