# Supplementary material
Source: publisher figshare collection journal article supplement (https://gsapubs.figshare.com/ndownloader/files/22410099)
Supplement: Supplementary file 1 [file 22410099 › Displacements_per_event.xlsx]

## Sheet: Disp_per_event_normal
Index	FAULT NAME	OFFSET PER EVENT (m)	disp inf	disp sup	CUMULATIVE offset (m)	inf	sup	Age of Feature offset	Age of earthquke (ka)	Uncertainties inf	Uncertainty_sup	Earthquake	RAKE	Longitude	Latitude
131	Yucca_west	0.18	0.15	0.2	0.18	0.15	0.2	0	3	0	6	MRE ?	normal	-116.51	36.7935		TOTAL events:	150		Range		COUNT	Range_name	% events
64	1932_GABBS_VALLEY	0.2	0.1	0.3	0.2	0.1	0.3	0	0.018	0.018	0.018	MRE	normal	-118.014	38.8317		Min	0.18		0	1	24	1	16
72	Dry_Hills	0.3	0.2	0.4	0.3	0.2	0.4	5.733	2.8665	0	5.733	MRE	normal	-116.438	40.4837		Max	5.5		1	2	49	2	32.6667
105	KAWICH_RANGE_WEST_SC	0.3	0.2	0.4	0.3	0.2	0.4	Early Holocene	9	9	18	MRE	normal	-116.369	37.6312		Mean	2.01177		2	3	46	3	30.6667
141	WAH_WAH	0.3	0.2	0.4	0.3	0.2	0.4	0	7.5	0	15	MRE	normal	-113.42	38.0853		std	1.13032		3	4	20	4	13.3333
133	EGLINTON	0.38	0.38	1?	0.38	0.38	1?	0	2.245	2.15	2.34	PE1	normal	-115.192	36.2668		Mean inf	1.687		4	5	9	5	6
84	Shoshone	0.4	0.3	0.5	0.4	0.3	0.5	0	3.317	2.953	3.681	MRE	normal	-116.931	40.4386		Mean sup	2.33034		5	6	2	6	1.33333
44	WEST_VALLEY	0.5	0.4	0.6	1.7	1.4	2	0	5.5	4.7	6.3	BL1	normal	-111.982	40.725
44	WEST_VALLEY	0.5	0.4	0.6	2.2	1.8	2.6	0	12.3	11.2	13.4	BL2	normal	-111.982	40.725		Error_inf	0.324767
44	WEST_VALLEY	0.5	0.4	0.6	2.7	2.2	3.2	0	13	11.9	14.1	BL3	normal	-111.982	40.725		Error_sup	0.318571
44	WEST_VALLEY	0.5	0.4	0.6	3.2	2.6	3.8	0	15.7	12.3	19.1	BL4	normal	-111.982	40.725
59	TOYABE_E	0.5	0.4	0.6	0.825	0.725	0.925	post stage II+ of carbonate soil development, Latest Pleistocene,	17 ?	13 ?	20	MRE	normal	-117.204	39.0288
67	1954_Rainbow_stillwater	0.5	0.2	0.8	0.3	0.2	0.4	0	-0.004	-0.004	-0.004	MRE	normal	-118.438	39.5204
80	PEAVINE_PEAK	0.5	0.4	0.6	0.5	0.4	0.6	0	2	0	2	MRE	normal	-119.916	39.6197
150	Hansel_valley	0.5	0.4	0.6	0.5	0.4	0.6	0	0.016	0.016	0.016	Penultimate	normal	-112.736	41.7424
44	WEST_VALLEY	0.6	0.5	0.7	0.6	0.5	0.7	0	1.5	1.3	1.7	MRE	normal	-111.982	40.725					Total		150		100
44	WEST_VALLEY	0.6	0.5	0.7	1.2	1	1.4	0	2.15	1.9	2.4	Penultimate	normal	-111.982	40.725
51	HURRICANE_Anderson_SHIVWITZ	0.6	0.5	0.7	0.6	0.5	0.7	0	7.5	5	10	MRE	normal	-113.325	36.8391
149	Bohnam_Ranch	0.6	0.5	0.7	3.5	3.3	3.6	0	7	2	12	Penultimate	normal	-119.845	40.44
93	WASATCH_Weber_segment	0.65	0.5	0.8	0.65	0.5	0.8	0	0.6	0.5	0.7	E1	normal	-111.911	41.0962
78	Malpais	0.7	0.6	0.8	0.7	0.6	0.8	0	7.45	7.338	7.562	MRE	normal	-116.448	40.6363
94	WEST_Dry_Lake	0.75	0.5	1	0.75	0.5	1	_	2.5	0	5	MRE	normal	-114.821	37.832
49	DESATOYA_W	0.8	0.7	0.9	0.8	0.7	0.9	0	17	13	20	MRE	normal	-117.682	39.5055
132	BELTED_RANGE	0.8	0.6	1	0.8	0.6	1	_	10	0	28	MRE	normal	-116.145	37.4771
70	CLAN_ALPINE	1	0.8	1.2	1	0.8	1.2	0	9	8	10	MRE, PE1	normal	-117.776	39.603
80	PEAVINE_PEAK	1	0.5	1	4	3.4	4.6	0	6.4 ?	6	8	0	normal	-119.916	39.6197
87	WASATCH_Brigham_segment	1	0.9	1.1	3.1	2.8	3.4	0	3.43	3.28	3.58	B2, Y	normal	-111.994	41.4859
90	WASATCH_Nephi_segment_northern_strand	1	0.7	1.3	4	3.5	4.5	0	0.9	0.7	1.1	SL1	normal	-111.734	40.0023
90	WASATCH_Nephi_segment_northern_strand	1	0.7	1.3	5	4.2	5.8	0	2.9	2.2	3.6	SL2	normal	-111.734	40.0023
90	WASATCH_Nephi_segment_northern_strand	1	0.7	1.3	6	4.9	7.1	0	4	3.5	4.5	SL3	normal	-111.734	40.0023
90	WASATCH_Nephi_segment_northern_strand	1	0.7	1.3	7	5.6	8.4	0	4.8	4	5.6	SL4	normal	-111.734	40.0023
90	WASATCH_Nephi_segment_northern_strand	1	0.7	1.3	8	6.3	9.7	0	5.7	4.9	6.5	SL5	normal	-111.734	40.0023
90	WASATCH_Nephi_segment_northern_strand	1	0.7	1.3	9	7	11	0	6.6	5.9	7.3	Sl6	normal	-111.734	40.0023
90	WASATCH_Nephi_segment_northern_strand	1	0.7	1.3	10	7.7	12.3	0	13.1	9.1	17.1	SL7	normal	-111.734	40.0023
143	ASH_MEADOWS	1	0.2	1.8	1	0.2	1.8	40	17	16.8	50	MRE	normal	-116.337	36.4415
9	TOQUIMA_NORTH	1.1	1	1.2	1.1	1	1.2	0	16	6	26	1 event	normal	-116.708	39.3486
47	BUTTE	1.1	0.95	1.3	2.2	1.9	2.6	0	30 ?	20?	40?	Penultimate	normal	-115.305	39.7671
86	STEENS_southern	1.1	1	1.2	3.3	2.7	3.9	0	6.1	5.6	6.6	Penultimate	normal	-118.709	41.9273
86	STEENS_southern	1.1	1	1.2	4.4	3.7	5.1	0	11.5	9.5	13.5	Antepenultimate	normal	-118.709	41.9273
47	BUTTE	1.125	0.95	1.3	1.125	0.95	1.3	77.5	20	18	22	MRE	normal	-115.305	39.7671
43	WASSUK_RANGE	1.15	1	1.3	1.15	1	1.3	0	0.325	0.1	0.55	MRE	normal	-118.734	38.596
67	1954_Rainbow_stillwater	1.2	1.2	1.5	3	3	4	0	14.8	11.8	17.8	Older event	normal	-118.438	39.5204
88	WASATCH_Salt_Lake_City_segment	1.2	0.8	1.5	7.8	6.7	9.1	0	7.7	7.3	8.1	S5	normal	-111.83	40.6705
88	WASATCH_Salt_Lake_City_segment	1.3	1.2	1.5	6.6	5.9	7.6	0	5.3	5.1	5.5	S4	normal	-111.83	40.6705
73	EASTGATE	1.3	1.2	1.4	1.3	1.2	1.4	0	5	4.8	5.2	MRE, PE1	normal	-117.885	39.3036
73	EASTGATE	1.3	1.1	2	6.7	6.3	7.6	0	31	31	59	P4	normal	-117.885	39.3036
4	HOUSE_range	1.4	1.3	1.5	1.4	1.3	1.5	0	15.5	12	19	At least 1 event	normal	-113.392	39.4194
93	WASATCH_Weber_segment	1.4	1.1	1.7	13.05	11.7	14.4	0	5.9	5.4	6.4	E5	normal	-111.911	41.0962
145	BLACK_HILLS	1.4	1.2	1.6	6.6	5.5	8.2	0	21?	12.65	25	PE4	normal	-114.939	35.9313
88	WASATCH_Salt_Lake_City_segment	1.4	1	1.8	11.5	9.3	13.9	0	12.6	11.4	13.8	S8	normal	-111.83	40.6705
145	BLACK_HILLS	1.45	0.8	1.6	5.2	4.3	6.6	0	17?	12.65	25	PE3	normal	-114.939	35.9313
40	STEENS_alvord	1.5	1.5	1.7	1.5	1.5	1.7	0	6.274	0.248	12.3	MRE	normal	-118.533	42.5557
59	TOYABE_E	1.5	1.4	1.6	3.3	3.2	3.4	0	40 ?	30?	77.5?	Penultimate	normal	-117.204	39.0288
67	1954_Rainbow_stillwater	1.5	1.4	1.6	1.8	1.7	1.9	0	8.15	6.3	10	Penultimate	normal	-118.438	39.5204
72	Dry_Hills	1.5	1.4	1.6	1.8	1.6	2	0	16.2	12.5	19.9	Penultimate	normal	-116.438	40.4837
72	Dry_Hills	1.5	1.4	1.6	3.3	3	3.6	0	28	27	29	Older earthquake	normal	-116.438	40.4837
88	WASATCH_Salt_Lake_City_segment	1.5	1.2	1.8	9.3	7.9	10.9	0	9.5	9.2	9.8	S6	normal	-111.83	40.6705
88	WASATCH_Salt_Lake_City_segment	1.5	1.2	1.8	10.1	8.3	12.1	0	10.9	10.7	11.1	S7	normal	-111.83	40.6705
88	WASATCH_Salt_Lake_City_segment	1.5	1.2	1.8	13	10.5	15.7	0	16.25	14.6	17.9	S9	normal	-111.83	40.6705
43	WASSUK_RANGE	1.6	1.3	2	2.75	2.3	3.3	0	5.345	1.39	9.3	Penultimate	normal	-118.734	38.596
46	ANTELOPE	1.65	1.6	1.7	1.65	1.6	1.7	0	18	15	21	MRE	normal	-116.27	39.2541
87	WASATCH_Brigham_segment	1.65	1.5	1.8	9.75	9.1	10.4	0	7.5	6.5	8.5	V	normal	-111.994	41.4859
5	MONITOR_W	1.7	1.5	1.9	1.7	1.5	1.9	0	44	34	54	MRE	normal	-116.6	39.3132
91	WASATCH_Nephi_segment_southern_strand	1.7	1.4	2	6.05	5.4	6.7	0	1.9	1.3	2.5	NC3, WC3	normal	-111.807	39.8339
145	BLACK_HILLS	1.75	1.5	2	1.75	1.5	2	0	6.415	2.25	10.58	MRE,PE1	normal	-114.939	35.9313
107	KEANE	1.8	1.6	2	1.8	1.6	2	6	4	0	8	MRE	normal	-116.865	36.6159
148	Black_Rock	1.8	1.7	1.9	1.8	1.7	1.9	0	0.55	0	1.1	MRE	normal	-119.027	41.0459
153	Round_valley	1.8	1.3	2	1.8	1.3	2	0	1.5?	0	3	MRE	normal	-118.647	37.4019
55	SCHELL_CREEK	1.9	1.8	2.2	1.9	1.8	2.2	13	6.5	0	13	MRE	normal	-114.538	39.4316
82	Santa_Rosa	1.9	1	2.8	1.9	1	2.8	0	13.5	11	16	MRE	normal	-117.747	41.6419
142	WEST_SPRING	1.9	1.8	2	1.9	1.8	2	0	20 ?	18	25 ?	MRE	normal	-115.921	36.2947
73	EASTGATE	1.95	1.9	2	5.4	5.2	5.6	0	25	24	26	P3	normal	-117.885	39.3036
92	WASATCH_Provo_segment	1.95	1.6	2.3	12.35	10.2	14.5	0	4.71	4.42	5	P4	normal	-111.632	40.2377
12	Bradys	2	1.8	2.2	2	1.8	2.2	0	7.75	0	15.5	MRE	normal	-119.004	39.8026
32	MONITOR_E	2	1.8	2.2	2	1.8	2.2	77.5	DATUM*	50	105	1 event	normal	-116.521	38.733
77	Humboldt_range	2	1.8	2.2	2	1.8	2.2	0	4.626	4.445	4.807	MRE	normal	-118.243	40.5014
78	Malpais	2	1.9	2.1	2.7	2.7	0	0	18.701	18.119	19.283	Penultimate	normal	-116.448	40.6363
80	PEAVINE_PEAK	2	1	2	2.25	1.9	2.6	0	4.2 ?	4	6	0	normal	-119.916	39.6197
80	PEAVINE_PEAK	2	1	2	5.75	4.9	6.6	0	8.8 ?	8	10	0	normal	-119.916	39.6197
80	PEAVINE_PEAK	2	1	2	7.5	6.4	8.6	0	11 ?	10	12	0	normal	-119.916	39.6197
81	Sand_Springs_La_Plata	2	1.9	2.1	2	1.9	2.1	0	3.4	3	4	MRE	normal	-118.324	39.2543
89	WASATCH_Levan_segment	2	1.8	2.2	4.4	3.6	5.2	0	4.825	4.825	unknown, 30?	Penultimate	normal	-111.861	39.5103
99	Beaver_basin_E	2	1	3	2	1	3	13.5	7.5	0	15	MRE	normal	-112.552	38.3177
135	Frenchman_mountain	2	1.5	2.5	2	1.5	2.5	0	70	10	130	MRE	normal	-115.014	36.168
138	RAILROAD_VALLEY_CENTRAL	2	1.5	2.5	2	1.5	2.5	0	17.5	5	30	MRE	normal	-115.532	39.0242
145	BLACK_HILLS	2	2	3	3.75	3.5	5	0	15?	12.65	25	PE2	normal	-114.939	35.9313
156	Surprise_valley	2	1	3	2	1	3	0	1.2	1.1	1.3	MRE, P1	normal	-120.196	41.511
156	Surprise_valley	2	1	3	4	2	6	0	5.8	4.3	7.3	P2	normal	-120.196	41.511
156	Surprise_valley	2	1	3	9	5	13	0	10.9	7.7	14.1	P4	normal	-120.196	41.511
87	WASATCH_Brigham_segment	2.1	1.9	2.3	2.1	1.9	2.3	0	2.42	2.16	2.68	B1, Z	normal	-111.994	41.4859
91	WASATCH_Nephi_segment_southern_strand	2.1	2	2.2	2.1	2	2.2	0	0.55	0.1	1	NC1-RC1	normal	-111.807	39.8339
73	EASTGATE	2.15	2.1	2.2	3.45	3.3	3.6	0	19	18	20	P2	normal	-117.885	39.3036
2	EGAN	2.2	2.1	2.3	2.2	2.1	2.3	0	51	42	60	1 event	normal	-114.872	39.6692
86	STEENS_southern	2.2	1.7	2.7	2.2	1.7	2.7	0	4.6	3.6	5.6	MRE	normal	-118.709	41.9273
85	STANSBURY_sum_ 3_segments	2.25	1.9	2.5	6.4	5.5	7.1	0	17 ?	15	18	Penultimate	normal	-112.667	40.3988
91	WASATCH_Nephi_segment_southern_strand	2.25	2	2.5	4.35	4	4.7	0	1.2	1.1	1.3	NC2	normal	-111.807	39.8339
75	GreatLake_Antelope	2.3	1.7	2.9	7.8	6.4	8.9	0	6.17	5.936	6.406	Y	normal	-112.242	40.8813
76	GreatLake_Fremont	2.3	1.7	2.9	7.8	6.4	8.9	0	6.412	6.201	6.621	Y	normal	-112.402	41.1341
79	OQUIRRH	2.3	2.3	2.3	4.75	4.5	5	0	23.285	20.37	26.2	penultimate	normal	-112.325	40.4333
87	WASATCH_Brigham_segment	2.35	2.2	2.5	12.1	11.3	12.9	0	8.5	7	10	U	normal	-111.994	41.4859
58	Snake_Deep_creek_valley	2.4	2.3	2.5	2.4	2.3	2.5	0	7.5	0	15	at least 1 event	normal	-114.068	39.2734
89	WASATCH_Levan_segment	2.4	1.8	3	2.4	1.8	3	0	1	0.85	1.15	MRE	normal	-111.861	39.5103
79	OQUIRRH	2.45	2.2	2.7	2.45	2.2	2.7	0	6.35	4.8	7.9	MRE	normal	-112.325	40.4333
92	WASATCH_Provo_segment	2.45	2.2	2.7	10.4	8.6	12.2	0	2.24	1.83	2.65	X,P3	normal	-111.632	40.2377
3	FISH_CREEK	2.5	2.3	2.7	2.5	2.3	2.7	0	28.9	28	29.7	MRE	normal	-116.086	39.2466
87	WASATCH_Brigham_segment	2.5	2.4	2.6	5.6	5.2	6	0	4.45	3.91	4.99	B3,X	normal	-111.994	41.4859
87	WASATCH_Brigham_segment	2.5	2.4	2.6	8.1	7.6	8.6	0	5.6	4.94	6.26	B4,W	normal	-111.994	41.4859
145	BLACK_HILLS	2.5	1.5	3	9.1	7.59	12.965	0	25	24	26	PE5	normal	-114.939	35.9313
154	Ruby_Wmountain	2.5	1	2.5	2.5	1	2.5	0	6.2	4.8	7.6	MRE	normal	-115.24	41.0086
61	1915_Pleasant_Valley	2.6	2.5	2.7	6.1	5.5	6.7	0	10.95	6.9	15	Penultimate	normal	-117.61	40.3297
93	WASATCH_Weber_segment	2.6	2.3	2.9	3.25	2.8	3.7	0	1.1	0.5	1.7	E2	normal	-111.911	41.0962
56	SCIPIO_LITTLEVALLEY	2.7	2.6	2.8	2.7	2.6	2.8	0	2.5	2	3	MRE	normal	-112.087	39.2189
77	Humboldt_range	2.7	2.6	2.8	4.7	4.4	5	0	35	25	45	penultimate	normal	-118.243	40.5014
52	HURRICANE_CEDAR	2.75	2.5	3	2.75	2.5	3	0	10	8	12	MRE	normal	-112.954	37.7821
65	1954_Dixie_valley	2.75	2.5	3	8.55	7	10.2	0	24.2	13	35.4	“IXL” event	normal	-118.184	39.6568
53	HURRICANE_whitmore_Canyon	2.78	2.32	3.24	2.78	2.32	3.24	0	10	5	15	MRE	normal	-113.225	36.239
65	1954_Dixie_valley	2.8	2.5	3.2	2.8	2.5	3.2	0	-0.004	-0.004	-0.004	MRE	normal	-118.184	39.6568
6	Pequops	2.9	2.8	3	2.9	2.8	3	0	42	32	52	MRE	normal	-114.624	40.8397
149	Bohnam_Ranch	2.9	2.8	2.9	2.9	2.8	2.9	0	0.29	0.22	0.36	MRE	normal	-119.845	40.44
8	Stillwater_Seismic_Gap	3	2	4	3	2	4	0	2.25	2	2.5	MRE (The bend event)	normal	-117.93	39.9513
10	TOQUIMA_SOUTH	3	2.8	3.2	3	2.8	3.2	0	57.75	55	60.5	1 event	normal	-116.802	38.8885
65	1954_Dixie_valley	3	2	4	5.8	4.5	7.2	0	2.25	2	2.5	Penultimate, "The Bend"	normal	-118.184	39.6568
70	CLAN_ALPINE	3	1.7	3	4	3.4	4.6	0	28	25	31	Penultimate, PE 2	normal	-117.776	39.603
90	WASATCH_Nephi_segment_northern_strand	3	2.8	3.2	3	2.8	3.2	0	0.4	0.3	0.5	S1	normal	-111.734	40.0023
130	White_river_valley	3	2.8	3.2	3	2.8	3.2	137	DATUM*	74	200	1 event	normal	-115.013	38.7406
156	Surprise_valley	3	2	4	7	4	10	0	8.5	8	9	P3	normal	-120.196	41.511
47	BUTTE	3.1	3	3.5	5.3	5	5.5	0	50?	40?	70?	Oldest event	normal	-115.305	39.7671
68	ANTELOPE_VALLEY	3.1	3	3.2	6.7	6.5	6.9	0	6.25	6.196	10 ?	Penultimate	normal	-119.53	38.6398
661	1954_Fairview_Peak_Bell_Flat_only	3.1	3	3.2	6.5	6	7	0	92.7	35.4	150	Penultimate	normal	-118.13	39.2813
92	WASATCH_Provo_segment	3.25	2.2	4.3	7.95	6.4	9.5	0	1.48	1.1	1.86	Y, P2	normal	-111.632	40.2377
83	Shawave_BlueWing	3.3	3	4	3.3	3	4	0	5.453	1.899	7.777	MRE	normal	-119.037	40.1991
661	1954_Fairview_Peak	3.4	3	3.8	3.4	3	3.8	0	-0.004	-0.004	-0.004	MRE	normal	-118.13	39.2813
61	1915_Pleasant_Valley	3.5	3	4	3.5	3	4	0	0.035	0.035	0.035	MRE	normal	-117.61	40.3297
140	Smith_valley	3.5	3	4	3.5	3	4	0	3.53	3.448	5.306	MRE	normal	-119.397	38.7926
68	ANTELOPE_VALLEY	3.6	3.5	3.7	3.6	3.5	3.7	0	1.35	1.312	1.414	MRE	normal	-119.53	38.6398
60	WEST_TAHOE	3.65	2.8	4.5	3.65	2.8	4.5	0	4.3	4.1	4.5	MRE	normal	-120.081	39.0818
144	Bear_River	3.65	2	5.3	3.65	2	5.3	0	2.37	1.32	3.42	MRE	normal	-110.798	40.9901
1	Drum_Mountains	3.7	3.6	3.8	3.7	3.6	3.8	0	9	6.75	13.5	MRE	normal	-112.911	39.4488
55	SCHELL_CREEK	3.7	3.6	3.85	5.6	5.4	6.05	0	32	30	35	Penultimate	normal	-114.538	39.4316
85	STANSBURY_sum_ 3_segments	4.15	3.6	4.6	4.15	3.6	4.6	0	7?	6	10	MRE	normal	-112.667	40.3988
57	SIMPSON_PARK	4.2	4.1	4.3	4.2	4.1	4.3	13	6.5	0	13	MRE	normal	-116.602	39.8721
93	WASATCH_Weber_segment	4.2	3.9	4.5	7.45	6.7	8.2	0	3.1	2.8	3.4	E3, B	normal	-111.911	41.0962
93	WASATCH_Weber_segment	4.2	3.9	4.5	11.65	10.6	12.7	0	4.5	4.2	4.8	E4, A	normal	-111.911	41.0962
74	GENOA	4.25	3	5.5	4.25	3	5.5	0	0.55	0.5	0.6	MRE	normal	-119.837	38.8823
7	Sonoma	4.5	4.4	4.6	4.5	4.4	4.6	0	20.027	19.353	20.701	MRE	normal	-117.683	40.9173
156	Surprise_valley	4.5	3.5	5.5	13.5	8.5	18.5	0	18.2	15.6	20.8	PX	normal	-120.196	41.511
71	Crescent	4.6	4.2	5	4.6	4.2	5	0	2.795	2.245	3.345	MRE	normal	-116.411	40.3282
92	WASATCH_Provo_segment	4.7	4.2	5.2	4.7	4.2	5.2	0	0.58	0.08	1.08	Z, P1	normal	-111.632	40.2377
11	West_Stillwater	5	4.9	5.1	5	4.9	5.1	0	6.225	5.6	6.85	MRE	normal	-118.284	39.7217
75	GreatLake_Antelope	5.5	4.7	6	5.5	4.7	6	0	0.586	0.345	0.787	MRE	normal	-112.242	40.8813

## Sheet: Disp_per_event_strikeslip
Fault index	FAULT NAME	OFFSET PER EVENT (m)	disp inf	disp sup	Age of earthquke (ka)	Uncertainties inf	Uncertainty_sup	Earthquake	RAKE
17	Excilor_Mountains	0.13	0.1	0.2	0.016	0.016	0.016	MRE	Senestral/Normal
26	GARLOCK_central_and_eastern	7 ?	6	8	0.405	0.31	0.5	MRE, W	Senestral
26	GARLOCK_central_and_eastern	7?	6	8	1.1375	1	1.275	U	Senestral
26	GARLOCK_central_and_eastern	4?	3	6	1.5875	1.475	1.7	R	Senestral
26	GARLOCK_central_and_eastern	7?	6	8	1.8	1.675	1.925	Q	Senestral
26	GARLOCK_central_and_eastern	7?	6	8	5.085	4.88	5.29	K	Senestral
26	GARLOCK_central_and_eastern	7?	6	8	6.935	6.62	7.25	F	Senestral
54	PYRAMID_LAKE	5.9	4.4	7.4	0.99	0.98	1	MRE	dextral
62	1932_MONTE_CRISTO	1.5	1	2	0.018	0.018	0.018	MRE	Dextral
63	1932_GABBS_MT_ANNIE	0.8	0.7	0.9	0.018	0.018	0.018	MRE	dextral
67	1954_Rainbow_stillwater	0.8	0.5	1	-0.004	-0.004	-0.004	MRE	dextral
139	San_Andreas_Wallace_Canyon	9.5	9.4	9.6	0.093	0.093	0.093	MRE	dextral
151	OWEN_valley	6	4	8	0.078	0.078	0.078	MRE	dextral
151	OWEN_valley	8.7	7.8	9.6	9.5	8.6	10.4	Penultimate	dextral
662	1954_Fairview_Peak	2.5	2	3	-0.004	-0.004	-0.004	MRE	dextral
1371	Panamint_S	3.2	2.7	3.7	2.5	0	5	MRE	right-lateral
160	Honey_Lake	7.95	5.3	10.6	2.4075	0	4.815	E1	dextral
162	Olinghouse	2.875	2.75	3	1.0025	0	2.005	MRE	Senestral
