# Supplementary material
Source: publisher figshare collection journal article supplement (https://gsapubs.figshare.com/ndownloader/files/22410099)
Supplement: Supplementary file 1 [file 22410099 › GIS_FAULTS_attributes_description.docx]

**GIS faults attributes description**

**(for GIS_FAULTS.kmz and GIS_FAULTS.shp files)**

**Index:** Index of the fault.

**Rake:** Rake of the fault.

**RECUavg:** Average earthquake recurrence interval, calculated when several paleo-earthquake ages are constrained for a fault. Value in kyr. Detailed list of inter-event recurrence intervals for each fault is reported in the file Recurrence_interval_data.xls.

**RECUmin:** Minimum earthquake recurrence interval, inferred when only the most recent earthquake age is constrained for a fault. Value in kyr. See Recurrence_intervals.xls for details.

**DPEavg:** Average displacement per event, calculated when several paleo-earthquake displacements are constrained for a fault. Value in meters. Detailed list of individual displacement per event for each fault is reported in the file Displacements_per_event.xls.

**DPEapprox:** Approximated displacement per event, inferred when only one paleo-earthquake displacement is constrained for a fault. Value in meters.

**MRE:** Most recent earthquake age. Value in ka before present. In case of historic most recent earthquake, the age value is reported in years A. D.

**FSR_15ka:** Finite fault slip-rate calculated for 0 to 15 ka time window (offset markers are 8 to 22 ka). Value in mm/yr.

**FSR_80ka**: Finite fault slip-rate calculated for 0 to 80 ka time window (offset markers are 50 to 100 ka). Value in mm/yr.

**FSR_150ka:** Finite fault slip-rate calculated for 0 to 150 ka time window (offset markers are 130 to 250 ka). Value in mm/yr.

**FSR_500ka:** Finite fault slip-rate calculated for 0 to 500 ka time window (offset markers are 350 to 800 ka). Value in mm/yr.

**FSR_1Ma:** Finite fault slip-rate calculated for 0 to 1 Ma time window (offset markers are 900 ka to 8 Ma). Value in mm/yr.

**Data_type:** Type of neotectonic data available on a fault.

**GENERAL COMMENTS**

- In the file GIS_FAULTS.kmz, faults are color-coded relative to their rake.
- **Uncertainties for recurrence intervals, displacements per event, most recent earthquake age and slip-rates data** are available inRecurrence_intervals.xls, Displacements_per_event.xls and NEOTECTONIC_DATA.xls supplementary files. In general, all details and comments about any data are described in NEOTECTONIC_DATA.xls.
- Finite fault slip-rate values, as well as supplemental transient slip-rate estimates, are summarized in the file Slip_rates.xls. Further slip-rate estimations, with time windows specific to each fault, are available in the file NEOTECTONIC_DATA.xls.
