# Supplementary material
Source: publisher figshare collection journal article supplement (https://gsapubs.figshare.com/ndownloader/files/22410099)
Supplement: Supplementary file 1 [file 22410099 › NEOTECTONIC_DATA.xlsm]

## Sheet: WELCOME
		ACTIVE FAULTS NEOTECTONIC DATABASE OF THE GREAT BASIN
		Pérouse and Wernicke 2016 (corresponding author : eugenie.perouse@gmail.com)
	1) In this excel file, each tab is associated to a fault. All the reference studies are listed in the last tab.
	2) Faults have been separated into 4 groups, depending on the type of neotectonic data available ( 1 paleo-earthquake only, offset datum, 1 paleo-earthquake+ offset datum, several paleo-earthquakes documented).
	3) Click on the fault name of your choice :
			FAULT NAME (clickable)	Fault index	Type of neotectonic data available		Total faults number :	171
			1915_Pleasant_Valley	61	Several paleo-earthquakes (with or without offset datum data)
			1932_GABBS_MT_ANNIE_Cedar_Mountain	63	1 paleo-earthquake only
			1932_GABBS_VALLEY_Cedar_Mountain	64	1 paleo-earthquake only
			1932_MONTE_CRISTO_Cedar_Mountain	62	Several paleo-earthquakes (with or without offset datum data)
			1954_Dixie_valley	65	Several paleo-earthquakes (with or without offset datum data)
			1954_Fairview_Peak_dextral	661	Several paleo-earthquakes (with or without offset datum data)
			1954_Fairview_Peak_normal	662	Several paleo-earthquakes (with or without offset datum data)
			1954_Rainbow_Mt_Stillwater	67	Several paleo-earthquakes (with or without offset datum data)
			2008_Wells_eq	95	1 paleo-earthquake only
			Anchorite_hills	16	Offset datum only
			ANTELOPE	46	Several paleo-earthquakes (with or without offset datum data)
			ANTELOPE_VALLEY	68	Several paleo-earthquakes (with or without offset datum data)
			Arrowhead_mine	96	Offset datum only
			ASH_MEADOWS	143	Several paleo-earthquakes (with or without offset datum data)
			Bear_River	144	Several paleo-earthquakes (with or without offset datum data)
			Beaver_basin_central	98	Offset datum only
			Beaver_basin_E	99	Offset datum only
			Beaver_ridge	100	Offset datum only
			BELTED	132	1 paleo-earthquake + offset datum
			BENTON_SPRINGS	34	Offset datum only
			BLACK_HILLS	145	Several paleo-earthquakes (with or without offset datum data)
			Black_Mountain_S	146	Offset datum only
			Black_Rock	148	Several paleo-earthquakes (with or without offset datum data)
			Black_Rock_fault_zone	159	Offset datum only
			Bonham_Ranch	149	Several paleo-earthquakes (with or without offset datum data)
			Bradys	12	1 paleo-earthquake only
			Buckeye_Creek	169	Offset datum only
			Buckhorn_fault	97	Offset datum only
			BUTTE	47	Several paleo-earthquakes (with or without offset datum data)
			CANDELARIA	15	Offset datum only
			CARSON_RANGE	69	Several paleo-earthquakes (with or without offset datum data)
			CLAN_ALPINE	70	Several paleo-earthquakes (with or without offset datum data)
			CLAYTON_VALLEY	13	Offset datum only
			Clear_Lake	158	Offset datum only
			COALDALE	14	Offset datum only
			Crescent	71	1 paleo-earthquake only
			Crickett_Mountains	48	1 paleo-earthquake + offset datum
			DESATOYA_E	24	Offset datum only
			DESATOYA_W	49	Several paleo-earthquakes (with or without offset datum data)
			Diamond_Range	25	Offset datum only
			Drum_Mountains	1	1 paleo-earthquake + offset datum
			Dry_Hills	72	Several paleo-earthquakes (with or without offset datum data)
			Dry_Lake	101	Offset datum only
			DVFL_cucu	20	Offset datum only
			DVFL_furnace	21	Offset datum only
			DVFL_indian	23	Offset datum only
			DVFL_perry	22	Offset datum only
			DVFL_redwall	19	Offset datum only
			DVFL_smud	18	Offset datum only
			east_mormon	102	Offset datum only
			EASTGATE	73	Several paleo-earthquakes (with or without offset datum data)
			EGAN	2	1 paleo-earthquake + offset datum
			EGLINGTON	133	1 paleo-earthquake + offset datum
			Enoch_graben	134	Offset datum only
			Excilor_Mountains	17	Offset datum only
			FISH_CREEK	3	1 paleo-earthquake + offset datum
			Fish_springs	50	1 paleo-earthquake + offset datum
			Frenchman_mountain	135	1 paleo-earthquake + offset datum
			GARLOCK_central_and_eastern	26	Several paleo-earthquakes (with or without offset datum data)
			GARLOCK_western	27	Offset datum only
			GENOA	74	Several paleo-earthquakes (with or without offset datum data)
			GreatLake_Antelope	75	Several paleo-earthquakes (with or without offset datum data)
			GreatLake_Fremont	76	Several paleo-earthquakes (with or without offset datum data)
			Hansel_valley	150	Several paleo-earthquakes (with or without offset datum data)
			Hilton_Creek	136	1 paleo-earthquake + offset datum
			HONEY_LAKE	160	Several paleo-earthquakes (with or without offset datum data)
			HOT_CREEK	103	Offset datum only
			House_range	4	1 paleo-earthquake only
			Humboldt_Range	77	Several paleo-earthquakes (with or without offset datum data)
			HUNTER_MOUNTAINS	28	Offset datum only
			HURRICANE_ANDERSON_SHIVWITZ	51	1 paleo-earthquake + offset datum
			HURRICANE_ASHCREEK	29	Offset datum only
			HURRICANE_CEDAR	52	1 paleo-earthquake + offset datum
			HURRICANE_WHITMORE	53	1 paleo-earthquake + offset datum
			Incline_village	167	Offset datum only
			KANE_WASH_normal	1041	Offset datum only
			KANE_WASH_senestral	1042	Offset datum only
			KAWICH_RANGE_W_North	106	Offset datum only
			KAWICH_RANGE_W_SouthCentral	105	1 paleo-earthquake + offset datum
			KEANE	107	1 paleo-earthquake + offset datum
			Lake_Range	163	Offset datum only
			LONE_MOUNTAIN	30	Offset datum only
			Malpais	78	Several paleo-earthquakes (with or without offset datum data)
			Mason	165	Offset datum only
			Maynard	108	Offset datum only
			Mesquite	109	Offset datum only
			MID_VALLEY	31	Offset datum only
			Mineral_Mountains	110	Offset datum only
			Mohawk	164	Several paleo-earthquakes (with or without offset datum data)
			MONITOR_E	32	Offset datum only
			MONITOR_W	5	1 paleo-earthquake + offset datum
			MonoLake_Hartley_springs	111	Offset datum only
			MonoLake_Lundy_Canyon	115	Offset datum only
			MonoLake_Reversed_Peak	112	Offset datum only
			MonoLake_Silver_Lake_bloody	114	Offset datum only
			MonoLake_Silver_Lake_parker	113	Offset datum only
			OASIS	116	Offset datum only
			OLINGHOUSE	162	Several paleo-earthquakes (with or without offset datum data)
			OQUIRRH	79	Several paleo-earthquakes (with or without offset datum data)
			OWEN_SNFF	119	Offset datum only
			OWEN_valley	151	Several paleo-earthquakes (with or without offset datum data)
			Pahoc	120	Offset datum only
			Panamint_S_dextral	1371	1 paleo-earthquake + offset datum
			Panamint_S_normal	1372	Offset datum only
			PEAVINE_PEAK	80	Several paleo-earthquakes (with or without offset datum data)
			PENOYER	121	Offset datum only
			Pequops	6	1 paleo-earthquake only
			PETRIFIED_SPRINGS	33	Offset datum only
			Promontory	152	Several paleo-earthquakes (with or without offset datum data)
			PYRAMID_LAKE	54	1 paleo-earthquake + offset datum
			QUEEN_VALLEY	35	Offset datum only
			RAILROAD_VALLEY_CENTRAL	138	1 paleo-earthquake + offset datum
			RAILROAD_VALLEY_SOUTHERN	122	Offset datum only
			ROCKET_WASH_BEATTY_WASH	123	Offset datum only
			Round_valley	153	Several paleo-earthquakes (with or without offset datum data)
			RUBY_valley	124	Offset datum only
			RUBY_Wmountain	154	Several paleo-earthquakes (with or without offset datum data)
			San_Andreas_1857_Wallace_Canyon	139	1 paleo-earthquake + offset datum
			San_Francisco	125	Offset datum only
			Sand_springs_La_Plata	81	Several paleo-earthquakes (with or without offset datum data)
			Santa_Rosa	82	Several paleo-earthquakes (with or without offset datum data)
			Sarcobatus	118	Offset datum only
			SCHELL_CREEK	55	Several paleo-earthquakes (with or without offset datum data)
			SCIPIO_LITTLEVALLEY	56	1 paleo-earthquake + offset datum
			SEVIER_central_toroweap	37	Offset datum only
			SEVIER_desert_decollement	157	Offset datum only
			SEVIER_northern_toroweap	38	Offset datum only
			SEVIER_SEVIER	36	Offset datum only
			Shawave_BlueWing	83	Several paleo-earthquakes (with or without offset datum data)
			Sheep_basin	126	Offset datum only
			SHOSHONE	84	Several paleo-earthquakes (with or without offset datum data)
			SIMPSON_PARK	57	Several paleo-earthquakes (with or without offset datum data)
			Smith_valley	140	1 paleo-earthquake + offset datum
			Snake_valley	58	1 paleo-earthquake only
			Sonoma	7	Several paleo-earthquakes (with or without offset datum data)
			Sonora_junction	168	Offset datum only
			South_Death_Valley_fault	147	Offset datum only
			STANSBURY	85	Several paleo-earthquakes (with or without offset datum data)
			State_Line	39	Offset datum only
			Stateline	166	Offset datum only
			STEENS_Alvord	40	1 paleo-earthquake + offset datum
			STEENS_MannLake	41	Offset datum only
			STEENS_southern	86	Several paleo-earthquakes (with or without offset datum data)
			StillwaterSeismic_Gap	8	1 paleo-earthquake only
			Surprise_valley	156	Several paleo-earthquakes (with or without offset datum data)
			TOLICHA_PEAK	117	Offset datum only
			TOQUIMA_NORTH	9	1 paleo-earthquake + offset datum
			TOQUIMA_SOUTH	10	1 paleo-earthquake + offset datum
			TOYABE_E	59	Several paleo-earthquakes (with or without offset datum data)
			TOYABE_W	42	Offset datum only
			Utah_Lake	128	Offset datum only
			WAH_WAH	141	1 paleo-earthquake + offset datum
			WARM_SPRINGS	161	Offset datum only
			WASATCH_BRIGHAM	87	Several paleo-earthquakes (with or without offset datum data)
			WASATCH_LAKECITY	88	Several paleo-earthquakes (with or without offset datum data)
			WASATCH_LEVAN	89	Several paleo-earthquakes (with or without offset datum data)
			WASATCH_NEPHI_N	90	Several paleo-earthquakes (with or without offset datum data)
			WASATCH_NEPHI_S	91	Several paleo-earthquakes (with or without offset datum data)
			WASATCH_PROVO	92	Several paleo-earthquakes (with or without offset datum data)
			WASATCH_WEBER	93	Several paleo-earthquakes (with or without offset datum data)
			Washington	129	Offset datum only
			WASSUK_RANGE	43	Several paleo-earthquakes (with or without offset datum data)
			WEST_DRY_LAKE	94	1 paleo-earthquake only
			WEST_SPRING	142	1 paleo-earthquake + offset datum
			West_stillwater	11	1 paleo-earthquake only
			WEST_TAHOE	60	1 paleo-earthquake + offset datum
			WEST_VALLEY	44	Several paleo-earthquakes (with or without offset datum data)
			WHITE_MOUNTAINS_dextral	451	Offset datum only
			WHITE_MOUNTAINS_normal	452	Offset datum only
			White_River_Valley	130	1 paleo-earthquake + offset datum
			Yucca_west	131	1 paleo-earthquake + offset datum

## Sheet: Bradys
	<< Go back to WELCOME page															>> REFERENCES list
INPUT DATA																							INFERRED SLIP-RATE
FAULT INDEX	FAULT NAME	Displacement per event (m)			Cumulative displacement (m)			Scarp diffusion	trench	OFFSET DATUM	AGE of OFFSET DATUM (ka)	AGE of EARTHQUAKE (ka)	Age uncertainties (ka)		Earthquake chronology	REFERENCES	Prefered slip-rate of the reference study	Comments, other references, etc.		Dip direction	RAKE		SLIP-RATE VALUES (mm/yr)			SLIP-RATE TYPE	SLIP-RATE TIME WINDOW
		mean	min	max	mean	min	max						lower bound	upper bound									mean	min	max
12	Bradys	2	1.8	2.2	2	1.8	2.2		yes	lacustrince deposits associated to Lake Lahontan recession	15.5	DATUM	15.4	15.6	MRE	Wesnousky et al. (2005)		Lake Lahontan reached its highstand 13,000 14C year BP ( 15,500 cal years B.P. [e.g., Adams and Wesnousky, 1998]). "The exposure indicates only one surface rupture earthquake subsequent to the highstand of Lake Lahontan".		W	normal		?	?	?	Transient : not well constrained, only 1 event post dates 15,5 ka	_
12	Bradys	2	1.8	2.2	2	1.8	2.2		yes	lacustrince deposits associated to Lake Lahontan recession		7.75	0	15.5	MRE	Wesnousky et al. (2005)					normal
		AGE (ka)					Displacement (m)					Trend line points
		mean	lower bound	upper bound	err inf	err sup	mean	lower bound	upper bound	error inf	error sup	Time	Displacement
	Earthquakes	7.75	0	15.5	7.75	7.75	2	1.8	2.2	0.2	0.2	0	0
												15.5	2
	OFFSET DATUM	15.5	15.4	15.6	0.1	0.1	2	1.8	2.2	0.2	0.2

## Sheet: Crescent
	<< Go back to WELCOME page															>> REFERENCES list
INPUT DATA																							INFERRED SLIP-RATE
FAULT INDEX	FAULT NAME	Displacement per event (m)			Cumulative displacement (m)			Scarp diffusion	trench	OFFSET DATUM	AGE of OFFSET DATUM (ka)	AGE of EARTHQUAKE (ka)	Age uncertainties (ka)		Earthquake chronology	REFERENCES	Prefered slip-rate of the reference study	Comments, other references, etc.		Dip direction	RAKE		SLIP-RATE VALUES (mm/yr)			SLIP-RATE TYPE	SLIP-RATE TIME WINDOW
		mean	min	max	mean	min	max						lower bound	upper bound									mean	min	max
71	Crescent	4.6	4.2	5	4.6	4.2	5			Earthquake colluvium		2.795	2.245	3.345	MRE	Friedrich et al. (2004)		We document the best example of such a disagreement across the NE striking, 55 NW dipping Crescent normal fault, where a NW oriented, 70 km geodetic baseline records conTransient shortening of 2 mm/yr orthogonal to the fault trace."		W	normal		?	?	?	Transient : Only 1 event known, not well constrained	_
71	Crescent	_	_	_	4.6	4.2	5			"Age of a strata near the base of the exposed section"	6.4	DATUM	6.4	6.4	no events	Friedrich et al. (2004)		No faulting between 2.6 and 6.3 ka. "Because we observe only the most recent event at 2.8 ka and an absence of faulting back to 6.4 ka".			normal		0.214	0.187	0.246	Finite displacement rate	0-14 Ma
71	Crescent	_	_	_	3000	2800	3200			Miocene bedrock	14000	DATUM	13000	15000		Friedrich et al. (2004)	Given 3 km of vertical displacement since 14 Ma, the average vertical rate is 0.2 mm/yr.				normal
		AGE (ka)					Displacement (m)					Trend line points
		mean	lower bound	upper bound	err inf	err sup	mean	lower bound	upper bound	error inf	error sup	Time	Displacement
	Earthquakes	2.795	2.245	3.345	0.55	0.55	4.6	4.2	5	0.4	0.4
												0	0
												6.4	4.6
	OFFSET DATUM	14000	13000	15000	1000	1000	3000	2800	3200	200	200
		6.4	6.4	6.4	0	0	4.6	4.2	5	0.4	0.4

## Sheet: House_range
	<< Go back to WELCOME page															>> REFERENCES list
INPUT DATA																							INFERRED SLIP-RATE
FAULT INDEX	FAULT NAME	Displacement per event (m)			Cumulative displacement (m)			Scarp diffusion	trench	OFFSET DATUM	AGE of OFFSET DATUM (ka)	AGE of EARTHQUAKE (ka)	Age uncertainties (ka)		Earthquake chronology	REFERENCES	Prefered slip-rate of the reference study	Comments, other references, etc.		Dip direction	RAKE		SLIP-RATE VALUES (mm/yr)			SLIP-RATE TYPE	SLIP-RATE TIME WINDOW
		mean	min	max	mean	min	max						lower bound	upper bound									mean	min	max
4	HOUSE_range	1.4	1.3	1.5	1.4	1.3	1.5			post Bonneville trangression		15.5	12	19	At least 1 event	Koehler and Wesnousky 2011		At least 1 event: ca. 12–19 ka and post-Bonneville transgression. Maximum vertical rate of 0.2mm/yr since 15 Ma (Niemi et al. 2004).		W	normal		0.09	0.068	0.125	Finite displacement rate	0-15.5 ka
		AGE (ka)					Displacement (m)					Trend line points
		mean	lower bound	upper bound	err inf	err sup	mean	lower bound	upper bound	error inf	error sup	Time	Displacement
	Earthquakes	15.5	12	19	3.5	3.5	1.4	1.3	1.5	0.1	0.1	0	0
												15.5	1.4
	OFFSET DATUM

## Sheet: Pequops
	<< Go back to WELCOME page															>> REFERENCES list
INPUT DATA																							INFERRED SLIP-RATE
FAULT INDEX	FAULT NAME	Displacement per event (m)			Cumulative displacement (m)			Scarp diffusion	trench	OFFSET DATUM	AGE of OFFSET DATUM (ka)	AGE of EARTHQUAKE (ka)	Age uncertainties (ka)		Earthquake chronology	REFERENCES	Prefered slip-rate of the reference study	Comments, other references, etc.		Dip direction	RAKE		SLIP-RATE VALUES (mm/yr)			SLIP-RATE TYPE	SLIP-RATE TIME WINDOW
		mean	min	max	mean	min	max						lower bound	upper bound									mean	min	max
6	Pequops	2.9	2.8	3	2.9	2.8	3	yes	yes	scarp modified by highstand shoreline feature		42	32	52	MRE	Wesnousky et al.2005		"'The deposit is 3 m thick at the fault, overprinted by stage 3+ pedogenic carbonate, thins westward, and the coarser component decreases upward and away from the fault. Unit 3 is on that basis interpreted to be fault derived colluvium. the earthquake that produced the scarp at trench 3 occurred about 42 ka and no surface ruptures have occurred since that time. The degree of soil development on c…		W	normal		0.069	0.054	0.094	Finite displacement rate, 1 event, maximum	0-40 ka
		AGE (ka)					Displacement (m)					Trend line points
		mean	lower bound	upper bound	err inf	err sup	mean	lower bound	upper bound	error inf	error sup	Time	Displacement
	Earthquakes	42	32	52	10	10	2.9	2.8	3	0.1	0.1	0	0
												42	2.9
	OFFSET DATUM

## Sheet: Snake_valley
	<< Go back to WELCOME page															>> REFERENCES list
INPUT DATA																							INFERRED SLIP-RATE
FAULT INDEX	FAULT NAME	Displacement per event (m)			Cumulative displacement (m)			Scarp diffusion	trench	OFFSET DATUM	AGE of OFFSET DATUM (ka)	AGE of EARTHQUAKE (ka)	Age uncertainties (ka)		Earthquake chronology	REFERENCES	Prefered slip-rate of the reference study	Comments, other references, etc.		Dip direction	RAKE		SLIP-RATE VALUES (mm/yr)			SLIP-RATE TYPE	SLIP-RATE TIME WINDOW
		mean	min	max	mean	min	max						lower bound	upper bound									mean	min	max
58	Snake_Deep_creek_valley	2.4	2.3	2.5	2.4	2.3	2.5			1 event post-date 15 ka		7.5	0	15	at least 1 event	Koehler and Wesnousky (2011)				E	normal		0.301			Finite displacement rate	0-17 Ma
58	Snake_Deep_creek_valley	_	_	_	5122.5	3495	6750				17000	DATUM	16000	18000		Miller et al. (1999)		This fault system extends along the eastern flank of the northern and southern Snake Range, Kern Mountains, and Deep Creek Range, and accommodated at least 12–15 km of rapid slip in the Miocene, ca. 17 Ma. Assuming a dip between 15 and 30 degrees, the vertical offset is between 3495m and 6750 m.			normal
		AGE (ka)					Displacement (m)					Trend line points
		mean	lower bound	upper bound	err inf	err sup	mean	lower bound	upper bound	error inf	error sup	Time	Displacement
	Earthquakes	7.5	0	15	7.5	7.5	2.4	2.3	2.5	0.1	0.1
												0	0
												15	2.4
	OFFSET DATUM	17000	16000	18000	1000	1000	5122.5	3495	6750	1627.5	1627.5

## Sheet: StillwaterSeismic_Gap
	<< Go back to WELCOME page															>> REFERENCES list
INPUT DATA																							INFERRED SLIP-RATE
FAULT INDEX	FAULT NAME	Displacement per event (m)			Cumulative displacement (m)			Scarp diffusion	trench	OFFSET DATUM	AGE of OFFSET DATUM (ka)	AGE of EARTHQUAKE (ka)	Age uncertainties (ka)		Earthquake chronology	REFERENCES	Prefered slip-rate of the reference study	Comments, other references, etc.		Dip direction	RAKE		SLIP-RATE VALUES (mm/yr)			SLIP-RATE TYPE	SLIP-RATE TIME WINDOW
		mean	min	max	mean	min	max						lower bound	upper bound									mean	min	max
8	Stillwater_Seismic_Gap	3	2	4	3	2	4					2.25	2	2.5	MRE (The bend event)	Caskey et al. (2000)		As discussed at the next stop, The Bend event produced much larger displacements in the Stillwater gap area where it is the only surface rupturing earthquake to have occurred in the last 12 ka.		E	normal		?	?	0.308	Transient : Only 1 event known, not well constrained	_
8	Stillwater_Seismic_Gap	_	_	_	3	2	4				12	DATUM	12	12		Caskey et al. (2000)		" it is the only surface rupturing earthquake to have occurred in the last 12 ka."		E	normal
		AGE (ka)					Displacement (m)					Trend line points
		mean	lower bound	upper bound	err inf	err sup	mean	lower bound	upper bound	error inf	error sup	Time	Displacement
	Earthquakes	2.25	2	2.5	0.25	0.25	3	2	4	1	1	0	0
												12	3
												2.25	3
												12	6
	OFFSET DATUM	12	12	12	0	0	3	2	4	1	1

## Sheet: WEST_DRY_LAKE
	<< Go back to WELCOME page															>> REFERENCES list
INPUT DATA																							INFERRED SLIP-RATE
FAULT INDEX	FAULT NAME	Displacement per event (m)			Cumulative displacement (m)			Scarp diffusion	trench	OFFSET DATUM	AGE of OFFSET DATUM (ka)	AGE of EARTHQUAKE (ka)	Age uncertainties (ka)		Earthquake chronology	REFERENCES	Prefered slip-rate of the reference study	Comments, other references, etc.		Dip direction	RAKE		SLIP-RATE VALUES (mm/yr)			SLIP-RATE TYPE	SLIP-RATE TIME WINDOW
		mean	min	max	mean	min	max						lower bound	upper bound									mean	min	max
94	WEST_Dry_Lake	0.75	0.5	1	0.75	0.5	1			Late Holocene	_	2.5	0	5	MRE	Swadley and Simonds (1994), in Anderson, R.E., compiler, 1999, Fault number 1125, West Dry Lake fault, USGS online database (See references list)		"These low scarps apparently were not formed at the site of pre existing scarps. "; "No detailed description of the low scarps is reported, but with scarp heights <1 m, they are not likely to be multiple-event features. "		E	normal		?	?	?	Only 1 recent event	_
		AGE (ka)					Displacement (m)					Trend line points
		mean	lower bound	upper bound	err inf	err sup	mean	lower bound	upper bound	error inf	error sup	Time	Displacement
	Earthquakes	2.5	0	5	2.5	2.5	0.75	0.5	1	0.25	0.25	0	0
												2.5	0.75
												2.5	0.75
												39.5	1.5
	OFFSET DATUM

## Sheet: West_stillwater
	<< Go back to WELCOME page															>> REFERENCES list
INPUT DATA																							INFERRED SLIP-RATE
FAULT INDEX	FAULT NAME	Displacement per event (m)			Cumulative displacement (m)			Scarp diffusion	trench	OFFSET DATUM	AGE of OFFSET DATUM (ka)	AGE of EARTHQUAKE (ka)	Age uncertainties (ka)		Earthquake chronology	REFERENCES	Prefered slip-rate of the reference study	Comments, other references, etc.		Dip direction	RAKE		SLIP-RATE VALUES (mm/yr)			SLIP-RATE TYPE	SLIP-RATE TIME WINDOW
		mean	min	max	mean	min	max						lower bound	upper bound									mean	min	max
11	West_Stillwater	5	4.9	5.1	5	4.9	5.1		yes	Colluvial wedge, and Mazama tephra offset		6.225	5.6	6.85	MRE	Bell et al. (2004)				W	normal		?	?	?	Only 1 event known, not well constrained	0-35 ka
																							recurrence time of 22 ka from Dixie valley
		AGE (ka)					Displacement (m)					Trend line points
		mean	lower bound	upper bound	err inf	err sup	mean	lower bound	upper bound	error inf	error sup	Time	Displacement
	Earthquakes	6.225	5.6	6.85	0.625	0.625	5	4.9	5.1	0.1	0.1	0	0
												6.225	5
												0	0
												28	7
	OFFSET DATUM

## Sheet: 2008_Wells_eq
	<< Go back to WELCOME page															>> REFERENCES list
INPUT DATA																							INFERRED SLIP-RATE
FAULT INDEX	FAULT NAME	Displacement per event (m)			Cumulative displacement (m)			Scarp diffusion	trench	OFFSET DATUM	AGE of OFFSET DATUM (ka)	AGE of EARTHQUAKE (ka)	Age uncertainties (ka)		Earthquake chronology	REFERENCES	Prefered slip-rate of the reference study	Comments, other references, etc.		Dip direction	RAKE		SLIP-RATE VALUES (mm/yr)			SLIP-RATE TYPE	SLIP-RATE TIME WINDOW
		mean	min	max	mean	min	max						lower bound	upper bound									mean	min	max
95	2008_Wells_eq	0	0	0	0	0	0			no surface offset		-0.058	-0.058	-0.058	MRE	Smith et al. 2011		2008 A.D ,Mw 6., no surface rupture		SE	normal		?	?	?	Mw6 in 2008	_
		AGE (ka)					Displacement (m)					Trend line points
		mean	lower bound	upper bound	err inf	err sup	mean	lower bound	upper bound	error inf	error sup	Time	Displacement
	Earthquakes
	OFFSET DATUM

[truncated: 145 more sheets: #OFFSET DATUM ONLY#, Arrowhead_mine, Black_Mountain_S, Black_Rock_fault_zone, Buckeye_Creek, Buckhorn_fault, Beaver_basin_central, Beaver_basin_E, Beaver_ridge, CLAYTON_VALLEY, Clear_Lake, COALDALE_Excilor, Death_Valley_Fish_Lake, DESATOYA_E, Diamond_Range, Dry_Lake, east_mormon, Enoch_graben, GARLOCK_western, HOT_CREEK …]
