# Supplementary material
Source: publisher figshare collection journal article supplement (https://gsapubs.figshare.com/ndownloader/files/22410099)
Supplement: Supplementary file 1 [file 22410099 › Paleoeq_catalog.xlsx]

## Sheet: Paleo_earthquakes
			Paleo-earthquakes catalog over the last 100 ka
				(Table associated to the file Paleoeq_catalog.kmz)
	Paleo-earthquakes catalog based from our compilation of neotectonic data. To see more information about a specific earthquake and its associated reference study, consult the file NEOTECTONIC_DATA.xls										Number of paleo-earthquakes :		239
Latitude	Longitude	Fault index	FAULT NAME	Age of earthquake (in ka before present)	Age lower bound (ka)	Age upper bound (ka)	Displacement per event (m)	Displacement lower bound (m)	Displacement upper bound (m)	Earthquake chronology	RAKE	Age of earthquake (in years A.D)	Age lower bound (years A.D)	Age upper bound (years A.D)
41.1637	-114.915	95	2008_Wells_eq	-0.058	-0.058	-0.058	0	0	0	MRE	normal	2008	2008	2008
36.8391	-113.325	51	HURRICANE_Anderson_SHIVWITZ	-0.042	-0.042	-0.042	0	0	0	MRE	normal	1992	1992	1992
41.7424	-112.736	150	Hansel_valley	-0.025	-0.025	-0.025	0	0	0	MRE	normal	1975	1975	1975
39.6568	-118.184	65	1954_Dixie_valley	-0.004	-0.004	-0.004	2.8	2.5	3.2	MRE	normal	1954	1954	1954
39.2813	-118.13	662	1954_Fairview_Peak	-0.004	-0.004	-0.004	2.5	2	3	MRE	dextral	1954	1954	1954
39.2813	-118.13	661	1954_Fairview_Peak	-0.004	-0.004	-0.004	3.4	3	3.8	MRE	normal	1954	1954	1954
39.5204	-118.438	67	1954_Rainbow_stillwater	-0.004	-0.004	-0.004	0.8	0.5	1	MRE	dextral	1954	1954	1954
39.5204	-118.438	67	1954_Rainbow_stillwater	-0.004	-0.004	-0.004	0.5	0.2	0.8	MRE	normal	1954	1954	1954
38.2548	-118.233	17	Excilor_Mountains	0.016	0.016	0.016	0.13	0.1	0.2	MRE	Senestral/Normal	1934	1934	1934
41.7424	-112.736	150	Hansel_valley	0.016	0.016	0.016	0.5	0.4	0.6	Penultimate	normal	1934	1934	1934
38.9733	-118.105	63	1932_GABBS_MT_ANNIE	0.018	0.018	0.018	0.8	0.7	0.9	MRE	dextral	1932	1932	1932
38.8317	-118.014	64	1932_GABBS_VALLEY	0.018	0.018	0.018	0.2	0.1	0.3	MRE	normal	1932	1932	1932
38.4074	-117.851	62	1932_MONTE_CRISTO	0.018	0.018	0.018	1.5	1	2	MRE	Dextral	1932	1932	1932
40.3297	-117.61	61	1915_Pleasant_Valley	0.035	0.035	0.035	3.5	3	4	MRE	normal	1915	1915	1915
36.7633	-118.123	151	OWEN_valley	0.078	0.078	0.078	6	4	8	MRE	dextral	1872	1872	1872
35.1776	-119.721	139	San_Andreas_Wallace_Canyon	0.093	0.093	0.093	9.5	9.4	9.6	MRE	dextral	1857	1857	1857
40.44	-119.845	149	Bohnam_Ranch	0.29	0.22	0.36	2.9	2.8	2.9	MRE	normal	_	_	_
38.596	-118.734	43	WASSUK_RANGE	0.325	0.1	0.55	1.15	1	1.3	MRE	normal	_	_	_
40.0023	-111.734	90	WASATCH_Nephi_segment_northern_strand	0.4	0.3	0.5	3	2.8	3.2	S1	normal	_	_	_
35.5411	-117.272	26	GARLOCK_central_and_eastern	0.405	0.31	0.5	7 ?	6	8	MRE, W	Senestral	_	_	_
41.0459	-119.027	148	Black_Rock	0.55	0	1.1	1.8	1.7	1.9	MRE	normal	_	_	_
38.8823	-119.837	74	GENOA	0.55	0.5	0.6	4.25	3	5.5	MRE	normal	_	_	_
39.8339	-111.807	91	WASATCH_Nephi_segment_southern_strand	0.55	0.1	1	2.1	2	2.2	NC1-RC1	normal	_	_	_
40.2377	-111.632	92	WASATCH_Provo_segment	0.58	0.08	1.08	4.7	4.2	5.2	Z, P1	normal	_	_	_
40.8813	-112.242	75	GreatLake_Antelope	0.586	0.345	0.787	5.5	4.7	6	MRE	normal	_	_	_
41.0962	-111.911	93	WASATCH_Weber_segment	0.6	0.5	0.7	0.65	0.5	0.8	E1	normal	_	_	_
39.355	-119.84	69	CARSON_RANGE_MT_ROSE	0.8415	0.729	0.954	1.75 ?	1	2.5	MRE	normal	_	_	_
40.0023	-111.734	90	WASATCH_Nephi_segment_northern_strand	0.9	0.7	1.1	1	0.7	1.3	SL1	normal	_	_	_
39.6812	-119.302	54	PYRAMID_LAKE	0.99	0.98	1	5.9	4.4	7.4	MRE	dextral	_	_	_
39.5103	-111.861	89	WASATCH_Levan_segment	1	0.85	1.15	2.4	1.8	3	MRE	normal	_	_	_
39.6336	-119.407	162	Olinghouse	1.0025	0	2.005	2.875	2.75	3	MRE	Senestral	_	_	_
41.0962	-111.911	93	WASATCH_Weber_segment	1.1	0.5	1.7	2.6	2.3	2.9	E2	normal	_	_	_
35.5411	-117.272	26	GARLOCK_central_and_eastern	1.1375	1	1.275	7?	6	8	U	Senestral	_	_	_
41.511	-120.196	156	Surprise_valley	1.2	1.1	1.3	2	1	3	MRE, P1	normal	_	_	_
39.8339	-111.807	91	WASATCH_Nephi_segment_southern_strand	1.2	1.1	1.3	2.25	2	2.5	NC2	normal	_	_	_
40.6705	-111.83	88	WASATCH_Salt_Lake_City_segment	1.3	1.1	1.5	1.75 ?	1.5	2.03333	S1	normal	_	_	_
38.6398	-119.53	68	ANTELOPE_VALLEY	1.35	1.312	1.414	3.6	3.5	3.7	MRE	normal	_	_	_
40.2377	-111.632	92	WASATCH_Provo_segment	1.48	1.1	1.86	3.25	2.2	4.3	Y, P2	normal	_	_	_
40.725	-111.982	44	WEST_VALLEY	1.5	1.3	1.7	0.6	0.5	0.7	MRE	normal	_	_	_
35.5411	-117.272	26	GARLOCK_central_and_eastern	1.5875	1.475	1.7	4?	3	6	R	Senestral	_	_	_
35.5411	-117.272	26	GARLOCK_central_and_eastern	1.8	1.675	1.925	7?	6	8	Q	Senestral	_	_	_
39.6487	-120.471	164	Mohawk	1.9	1.8	2	1,35 ?	1?	2?	E1	Dextral	_	_	_
37.6242	-118.825	136	Hilton_Creek	1.9	0	3.8	2?	1.8?	2.5?	MRE	normal	_	_	_
39.8339	-111.807	91	WASATCH_Nephi_segment_southern_strand	1.9	1.3	2.5	1.7	1.4	2	NC3, WC3	normal	_	_	_
39.6197	-119.916	80	PEAVINE_PEAK	2	0	2	0.5	0.4	0.6	MRE,event1	normal	_	_	_
38.8823	-119.837	74	GENOA	2.1	2	2.2	4.3?	3?	5.5?	Penultimate	normal	_	_	_
39.355	-119.84	69	CARSON_RANGE_MT_ROSE	2.1125	1.543	2.682	1.75 ?	1	2.5	Penultimate	normal	_	_	_
40.725	-111.982	44	WEST_VALLEY	2.15	1.9	2.4	0.6	0.5	0.7	Penultimate	normal	_	_	_
40.6705	-111.83	88	WASATCH_Salt_Lake_City_segment	2.2	2	2.4	1.75 ?	1.5	2.03333	S2	normal	_	_	_
40.2377	-111.632	92	WASATCH_Provo_segment	2.24	1.83	2.65	2.45	2.2	2.7	X,P3	normal	_	_	_
36.2668	-115.192	133	EGLINTON	2.245	2.15	2.34	0.38	0.38	1?	PE1	normal	_	_	_
39.9513	-117.93	8	Stillwater_Seismic_Gap	2.25	2	2.5	3	2	4	MRE (The bend event)	normal	_	_	_
39.6568	-118.184	65	1954_Dixie_valley	2.25	2	2.5	3	2	4	Penultimate, "The Bend"	normal	_	_	_
40.9901	-110.798	144	Bear_River	2.37	1.32	3.42	3.65	2	5.3	MRE	normal	_	_	_
40.1317	-120.23	160	Honey_Lake	2.4075	0	4.815	7.95	5.3	10.6	E1	Dextral	_	_	_
41.4859	-111.994	87	WASATCH_Brigham_segment	2.42	2.16	2.68	2.1	1.9	2.3	B1, Z	normal	_	_	_
35.8099	-117.133	1371	Panamint_S	2.5	0	5	3.2	2.7	3.7	MRE	right-lateral	_	_	_
39.2189	-112.087	56	SCIPIO_LITTLEVALLEY	2.5	2	3	2.7	2.6	2.8	MRE	normal	_	_	_
37.832	-114.821	94	WEST_Dry_Lake	2.5	0	5	0.75	0.5	1	MRE	normal	_	_	_
40.3282	-116.411	71	Crescent	2.795	2.245	3.345	4.6	4.2	5	MRE	normal	_	_	_
40.4837	-116.438	72	Dry_Hills	2.8665	0	5.733	0.3	0.2	0.4	MRE	normal	_	_	_
40.0023	-111.734	90	WASATCH_Nephi_segment_northern_strand	2.9	2.2	3.6	1	0.7	1.3	SL2	normal	_	_	_
36.7935	-116.51	131	Yucca_west	3	0	6	0.18	0.15	0.2	MRE ?	normal	_	_	_
41.0459	-119.027	148	Black_Rock	3.05	1.1	5	1.8 ?	1.7	1.9	Penultimate	normal	_	_	_
41.0962	-111.911	93	WASATCH_Weber_segment	3.1	2.8	3.4	4.2	3.9	4.5	E3, B	normal	_	_	_
41.1341	-112.402	76	GreatLake_Fremont	3.15	2.939	3.385	5.5 ?	4.7	6	MRE	normal	_	_	_
39.6336	-119.407	162	Olinghouse	3.17	2.79	3.55	2,8 ?	_	_	Penultimate	Senestral	_	_	_
40.4386	-116.931	84	Shoshone	3.317	2.953	3.681	0.4	0.3	0.5	MRE	normal	_	_	_
39.8161	-113.429	50	Fish_springs	3.4	2	4.8	0.825 ?	0.8	0.85	MRE	normal	_	_	_
39.2543	-118.324	81	Sand_Springs_La_Plata	3.4	3	4	2	1.9	2.1	MRE	normal	_	_	_
41.4859	-111.994	87	WASATCH_Brigham_segment	3.43	3.28	3.58	1	0.9	1.1	B2, Y	normal	_	_	_
38.7926	-119.397	140	Smith_valley	3.53	3.448	5.306	3.5	3	4	MRE	normal	_	_	_
36.6159	-116.865	107	KEANE	4	0	8	1.8	1.6	2	MRE	normal	_	_	_
39.8339	-111.807	91	WASATCH_Nephi_segment_southern_strand	4	3.9	4.1	2 ?	1.4	2.5	NC4	normal	_	_	_
40.0023	-111.734	90	WASATCH_Nephi_segment_northern_strand	4	3.5	4.5	1	0.7	1.3	SL3	normal	_	_	_
38.4074	-117.851	62	1932_MONTE_CRISTO	4	2	6	1.5 ?	1 ?	2?	Y	Dextral	_	_	_
40.6705	-111.83	88	WASATCH_Salt_Lake_City_segment	4.1	3.9	4.3	1.75 ?	1.5	2.03333	S3	normal	_	_	_
39.0818	-120.081	60	WEST_TAHOE	4.3	4.1	4.5	3.65	2.8	4.5	MRE	normal	_	_	_
41.4859	-111.994	87	WASATCH_Brigham_segment	4.45	3.91	4.99	2.5	2.4	2.6	B3,X	normal	_	_	_
41.0962	-111.911	93	WASATCH_Weber_segment	4.5	4.2	4.8	4.2	3.9	4.5	E4, A	normal	_	_	_
41.9273	-118.709	86	STEENS_southern	4.6	3.6	5.6	2.2	1.7	2.7	MRE	normal	_	_	_
40.9901	-110.798	144	Bear_River	4.62	3.93	5.31	3.65 ?	2	5.3	Penulitmate	normal	_	_	_
40.5014	-118.243	77	Humboldt_range	4.626	4.445	4.807	2	1.8	2.2	MRE	normal	_	_	_
39.8339	-111.807	91	WASATCH_Nephi_segment_southern_strand	4.7	4	5.4	2 ?	1.4	2.5	NC5	normal	_	_	_
40.2377	-111.632	92	WASATCH_Provo_segment	4.71	4.42	5	1.95	1.6	2.3	P4	normal	_	_	_
39.6812	-119.302	54	PYRAMID_LAKE	4.74	1.88	7.6	5.9 ?	4.4	7.4	_	dextral	_	_	_
40.0023	-111.734	90	WASATCH_Nephi_segment_northern_strand	4.8	4	5.6	1	0.7	1.3	SL4	normal	_	_	_
39.3036	-117.885	73	EASTGATE	5	4.8	5.2	1.3	1.2	1.4	MRE, PE1	normal	_	_	_
38.4074	-117.851	62	1932_MONTE_CRISTO	5	3	7	1.5 ?	2 ?	2?	X	Dextral	_	_	_
40.1317	-120.23	160	Honey_Lake	5.085	4.525	5.645	?	_	_	E2	Dextral	_	_	_
35.5411	-117.272	26	GARLOCK_central_and_eastern	5.085	4.88	5.29	7?	6	8	K	Senestral	_	_	_
40.6705	-111.83	88	WASATCH_Salt_Lake_City_segment	5.3	5.1	5.5	1.3	1.2	1.5	S4	normal	_	_	_
38.596	-118.734	43	WASSUK_RANGE	5.345	1.39	9.3	1.6	1.3	2	Penultimate	normal	_	_	_
40.1991	-119.037	83	Shawave_BlueWing	5.453	1.899	7.777	3.3	3	4	MRE	normal	_	_	_
40.725	-111.982	44	WEST_VALLEY	5.5	4.7	6.3	0.5	0.4	0.6	BL1	normal	_	_	_
41.4859	-111.994	87	WASATCH_Brigham_segment	5.6	4.94	6.26	2.5	2.4	2.6	B4,W	normal	_	_	_
40.2377	-111.632	92	WASATCH_Provo_segment	5.64	5.23	6.92	2?	1.6	2.3	P5	normal	_	_	_
39.6487	-120.471	164	Mohawk	5.7	2.7	8.7	1,35 ?	1?	2?	E2	Dextral	_	_	_
40.0023	-111.734	90	WASATCH_Nephi_segment_northern_strand	5.7	4.9	6.5	1	0.7	1.3	SL5	normal	_	_	_
41.511	-120.196	156	Surprise_valley	5.8	4.3	7.3	2	1	3	P2	normal	_	_	_
41.0962	-111.911	93	WASATCH_Weber_segment	5.9	5.4	6.4	1.4	1.1	1.7	E5	normal	_	_	_
40.1317	-120.23	160	Honey_Lake	6.085	5.475	6.695	?	_	_	E3	Dextral	_	_	_
41.9273	-118.709	86	STEENS_southern	6.1	5.6	6.6	1.1	1	1.2	Penultimate	normal	_	_	_
40.8813	-112.242	75	GreatLake_Antelope	6.17	5.936	6.406	2.3	1.7	2.9	Y	normal	_	_	_
41.0086	-115.24	154	Ruby_Wmountain	6.2	4.8	7.6	2.5	1	2.5	MRE	normal	_	_	_
39.7217	-118.284	11	West_Stillwater	6.225	5.6	6.85	5	4.9	5.1	MRE	normal	_	_	_
38.6398	-119.53	68	ANTELOPE_VALLEY	6.25	6.196	10 ?	3.1	3	3.2	Penultimate	normal	_	_	_
42.5557	-118.533	40	STEENS_alvord	6.274	0.248	12.3	1.5	1.5	1.7	MRE	normal	_	_	_
40.4333	-112.325	79	OQUIRRH	6.35	4.8	7.9	2.45	2.2	2.7	MRE	normal	_	_	_
41.1341	-112.402	76	GreatLake_Fremont	6.412	6.201	6.621	2.3	1.7	2.9	Y	normal	_	_	_
35.9313	-114.939	145	BLACK_HILLS	6.415	2.25	10.58	1.75	1.5	2	MRE,PE1	normal	_	_	_
39.4316	-114.538	55	SCHELL_CREEK	6.5	0	13	1.9	1.8	2.2	MRE	normal	_	_	_
39.8721	-116.602	57	SIMPSON_PARK	6.5	0	13	4.2	4.1	4.3	MRE	normal	_	_	_
40.0023	-111.734	90	WASATCH_Nephi_segment_northern_strand	6.6	5.9	7.3	1	0.7	1.3	Sl6	normal	_	_	_
40.1317	-120.23	160	Honey_Lake	6.8525	6.505	7.2	?	_	_	E4	Dextral	_	_	_
35.5411	-117.272	26	GARLOCK_central_and_eastern	6.935	6.62	7.25	7?	6	8	F	Senestral	_	_	_
40.44	-119.845	149	Bohnam_Ranch	7	2	12	0.6	0.5	0.7	Penultimate	normal	_	_	_
40.6363	-116.448	78	Malpais	7.45	7.338	7.562	0.7	0.7	0	MRE	normal	_	_	_
39.2734	-114.068	58	Snake_Deep_creek_valley	7.5	0	15	2.4	2.3	2.5	at least 1 event	normal	_	_	_
38.3177	-112.552	99	Beaver_basin_E	7.5	0	15	2	1	3	MRE	normal	_	_	_
36.8391	-113.325	51	HURRICANE_Anderson_SHIVWITZ	7.5	5	10	0.6	0.5	0.7	MRE	normal	_	_	_
38.0853	-113.42	141	WAH_WAH	7.5	0	15	0.3	0.2	0.4	MRE	normal	_	_	_
41.4859	-111.994	87	WASATCH_Brigham_segment	7.5	6.5	8.5	1.65	1.5	1.8	V	normal	_	_	_
40.6705	-111.83	88	WASATCH_Salt_Lake_City_segment	7.7	7.3	8.1	1.2	0.8	1.5	S5	normal	_	_	_
39.8026	-119.004	12	Bradys	7.75	0	15.5	2	1.8	2.2	MRE	normal	_	_	_
39.5204	-118.438	67	1954_Rainbow_stillwater	8.15	6.3	10	1.5	1.4	1.6	Penultimate	normal	_	_	_
38.8875	-113.058	48	Crickett_Mountains	8.4	0	16.8	0.65 ?	0.6 ?	0.7 ?	MRE	normal	_	_	_
39.6812	-119.302	54	PYRAMID_LAKE	8.403	7.6	9.206	5.9 ?	4.4	7.4	_	dextral	_	_	_
41.511	-120.196	156	Surprise_valley	8.5	8	9	3	2	4	P3	normal	_	_	_
41.4859	-111.994	87	WASATCH_Brigham_segment	8.5	7	10	2.35	2.2	2.5	U	normal	_	_	_
39.355	-119.84	69	CARSON_RANGE_MT_ROSE	8.503	8.417	8.589	1.75 ?	1	2.5	P3	normal	_	_	_
39.4488	-112.911	1	Drum_Mountains	9	6.75	13.5	3.7	3.6	3.8	MRE	normal	_	_	_
37.6312	-116.369	105	KAWICH_RANGE_WEST_SC	9	9	18	0.3	0.2	0.4	MRE	normal	_	_	_
39.603	-117.776	70	CLAN_ALPINE	9	8	10	1	0.8	1.2	MRE, PE1	normal	_	_	_
41.1341	-112.402	76	GreatLake_Fremont	9.3265	6.621	12.032	2.3 ?	1.7?	2.9 ?	X	normal	_	_	_
36.7633	-118.123	151	OWEN_valley	9.5	8.6	10.4	8.7	7.8	9.6	Penultimate	dextral	_	_	_
40.6705	-111.83	88	WASATCH_Salt_Lake_City_segment	9.5	9.2	9.8	1.5	1.2	1.8	S6	normal	_	_	_
40.8813	-112.242	75	GreatLake_Antelope	9.898	9.596	10.145	2.3 ?	1.7?	2.9 ?	X	normal	_	_	_
37.4771	-116.145	132	BELTED_RANGE	10	0	28	0.8	0.6	1	MRE	normal	_	_	_
37.7821	-112.954	52	HURRICANE_CEDAR	10	8	12	2.75	2.5	3	MRE	normal	_	_	_
36.239	-113.225	53	HURRICANE_whitmore_Canyon	10	5	15	2.78	2.32	3.24	MRE	normal	_	_	_
41.511	-120.196	156	Surprise_valley	10.9	7.7	14.1	2	1	3	P4	normal	_	_	_
40.6705	-111.83	88	WASATCH_Salt_Lake_City_segment	10.9	10.7	11.1	1.5	1.2	1.8	S7	normal	_	_	_
40.3297	-117.61	61	1915_Pleasant_Valley	10.95	6.9	15	2.6	2.5	2.7	Penultimate	normal	_	_	_
41.9273	-118.709	86	STEENS_southern	11.5	9.5	13.5	1.1	1	1.2	Antepenultimate	normal	_	_	_
38.4074	-117.851	62	1932_MONTE_CRISTO	12	10	14	1.5 ?	3 ?	2?	W	Dextral	_	_	_
40.725	-111.982	44	WEST_VALLEY	12.3	11.2	13.4	0.5	0.4	0.6	BL2	normal	_	_	_
39.6812	-119.302	54	PYRAMID_LAKE	12.353	9.206	15.5	5.9 ?	4.4	7.4	_	dextral	_	_	_
40.6705	-111.83	88	WASATCH_Salt_Lake_City_segment	12.6	11.4	13.8	1.4	1	1.8	S8	normal	_	_	_
39.6487	-120.471	164	Mohawk	12.8	11.4	14.2	?	?	?	E3	Dextral	_	_	_
40.725	-111.982	44	WEST_VALLEY	13	11.9	14.1	0.5	0.4	0.6	BL3	normal	_	_	_
41.7424	-112.736	150	Hansel_valley	13	12.5	13.5	2.25 ??	2 ?	2.5 ?	one event	normal	_	_	_
40.0023	-111.734	90	WASATCH_Nephi_segment_northern_strand	13.1	9.1	17.1	1	0.7	1.3	SL7	normal	_	_	_
41.6419	-117.747	82	Santa_Rosa	13.5	11	16	1.9	1	2.8	MRE	normal	_	_	_
41.0459	-119.027	148	Black_Rock	14	5	23	0.5 ?	0	0	_	normal	_	_	_
39.6487	-120.471	164	Mohawk	14	13	15	?	?	?	E4	Dextral	_	_	_
41.7424	-112.736	150	Hansel_valley	14.5	14	15	2.25 ??	2 ?	2.5 ?	one event	normal	_	_	_
39.5204	-118.438	67	1954_Rainbow_stillwater	14.8	11.8	17.8	1.2	1.2	1.5	Older event	normal	_	_	_
39.355	-119.84	69	CARSON_RANGE_MT_ROSE	15	8.4	28	1.75 ?	1	2.5	P4	normal	_	_	_
38.4074	-117.851	62	1932_MONTE_CRISTO	15	13	17	1.5 ?	4 ?	2?	V	Dextral	_	_	_
41.4859	-111.994	87	WASATCH_Brigham_segment	15.3	13.6	17	2.3 ?	2	2.5	T	normal	_	_	_
39.4194	-113.392	4	HOUSE_range	15.5	12	19	1.4	1.3	1.5	At least 1 event	normal	_	_	_
40.725	-111.982	44	WEST_VALLEY	15.7	12.3	19.1	0.5	0.4	0.6	BL4	normal	_	_	_
39.3486	-116.708	9	TOQUIMA_NORTH	16	6	26	1.1	1	1.2	1 event	normal	_	_	_
40.4837	-116.438	72	Dry_Hills	16.2	12.5	19.9	1.5	1.4	1.6	Penultimate	normal	_	_	_
40.6705	-111.83	88	WASATCH_Salt_Lake_City_segment	16.25	14.6	17.9	1.5	1.2	1.8	S9	normal	_	_	_
36.4415	-116.337	143	ASH_MEADOWS	17	16.8	50	1	0.2	1.8	MRE	normal	_	_	_
35.9313	-114.939	145	BLACK_HILLS	17	12.65	25	1.45	0.8	1.6	PE3	normal	_	_	_
39.0242	-115.532	138	RAILROAD_VALLEY_CENTRAL	17.5	5	30	2	1.5	2.5	MRE	normal	_	_	_
39.6336	-119.407	162	Olinghouse	17.965	15.5	20.43	2,8 ?	_	_	Older event	Senestral	_	_	_
39.2541	-116.27	46	ANTELOPE	18	15	21	1.65	1.6	1.7	MRE	normal	_	_	_
38.4074	-117.851	62	1932_MONTE_CRISTO	18	16	20	1.5 ?	5 ?	2?	U	Dextral	_	_	_
41.511	-120.196	156	Surprise_valley	18.2	15.6	20.8	4.5	3.5	5.5	PX	normal	_	_	_
40.6363	-116.448	78	Malpais	18.701	18.119	19.283	2	2	0	Penultimate	normal	_	_	_
39.3036	-117.885	73	EASTGATE	19	18	20	2.15	2.1	2.2	P2	normal	_	_	_
39.7671	-115.305	47	BUTTE	20	18	30	1.125	0.95	1.3	MRE	normal	_	_	_
40.9173	-117.683	7	Sonoma	20.027	19.353	20.701	4.5	4.4	4.6	MRE	normal	_	_	_
36.7633	-118.123	151	OWEN_valley	20.4	14.6	26.2	6?	4?	8?	Antepenultimate	dextral	_	_	_
40.4333	-112.325	79	OQUIRRH	23.285	20.37	26.2	2.3	2.3	2.3	penultimate	normal	_	_	_
41.0459	-119.027	148	Black_Rock	24	23	25	1.8 ?	0	0	_	normal	_	_	_
39.6568	-118.184	65	1954_Dixie_valley	24.2	13	35.4	2.75	2.5	3	“IXL” event	normal	_	_	_
39.3036	-117.885	73	EASTGATE	25	24	26	1.95	1.9	2	P3	normal	_	_	_
35.9313	-114.939	145	BLACK_HILLS	25	24	26	2.5	1.5	3	PE5	normal	_	_	_
40.4837	-116.438	72	Dry_Hills	28	27	29	1.5	1.4	1.6	Older earthquake	normal	_	_	_
39.603	-117.776	70	CLAN_ALPINE	28	25	31	3	1.7	3	Penultimate, PE 2	normal	_	_	_
39.2466	-116.086	3	FISH_CREEK	28.9	28	29.7	2.5	2.3	2.7	MRE	normal	_	_	_
41.7424	-112.736	150	Hansel_valley	30	26	58	2.25 ??	2 ?	2.5 ?	one event	normal	_	_	_
39.3036	-117.885	73	EASTGATE	31	31	59	1.3	1.1	2	P4	normal	_	_	_
39.4316	-114.538	55	SCHELL_CREEK	32	30	35	3.7	3.6	3.85	Penultimate	normal	_	_	_
40.5014	-118.243	77	Humboldt_range	35	25	45	2.7	2.6	2.8	penultimate	normal	_	_	_
40.8397	-114.624	6	Pequops	42	32	52	2.9	2.8	3	MRE	normal	_	_	_
39.3132	-116.6	5	MONITOR_W	44	34	54	1.7	1.5	1.9	MRE	normal	_	_	_
39.6692	-114.872	2	EGAN	51	42	60	2.2	2.1	2.3	MRE	normal	_	_	_
40.4333	-112.325	79	OQUIRRH	55	32.79	60	2.3 ?	1.5 ?	3.1 ?	antepenultimate Vertical offset unkwonm	normal	_	_	_
38.8885	-116.802	10	TOQUIMA_SOUTH	57.75	55	60.5	3	2.8	3.2	1 event	normal	_	_	_
39.2813	-118.13	662	1954_Fairview_Peak_Bell_Flat_only	92.7	35.4	150	2.5?	2	3	Penultimate	dextral	_	_	_
39.2813	-118.13	661	1954_Fairview_Peak_Bell_Flat_only	92.7	35.4	150	3.1	3	3.2	Penultimate	normal	_	_	_
41.6419	-117.747	82	Santa_Rosa	99	90	108	1.9 ?	1 ?	2.8 ?	Penultimate	normal	_	_	_
36.4415	-116.337	143	ASH_MEADOWS	100	30	130	2.4 ?	2?	3?	Penultimate	normal	_	_	_
41.6419	-117.747	82	Santa_Rosa	140	125	155	1.9 ?	2?	2.8 ?	Antepenultimate	normal	_	_	_
37.4019	-118.647	153	Round_valley	1.5?	0	3	1.8	1.3	2	MRE	normal	_	_	_
39.603	-117.776	70	CLAN_ALPINE	100?	90 ?	130 ?	1.65 ?	1.5	2	PE 4	normal	_	_	_
39.2543	-118.324	81	Sand_Springs_La_Plata	11?	7.3	13.3	2 ?	1.9 ?	2.1 ?	Antepenultimate	normal	_	_	_
39.6197	-119.916	80	PEAVINE_PEAK	11?	10	12	2	1	2	event 5	normal	_	_	_
41.7787	-112.559	152	Promontory	12?	10	14	2.25 ??	2 ?	2.5 ?	_	normal	_	_	_
37.4019	-118.647	153	Round_valley	12?	11	13	1.8?	1.3 ?	2?	_	normal	_	_	_
39.8161	-113.429	50	Fish_springs	13?	8.7	17	0.825 ?	0.8 ?	0.85 ?	_	normal	_	_	_
37.4019	-118.647	153	Round_valley	15?	14	16	1.8?	1.3 ?	2?	_	normal	_	_	_
35.9313	-114.939	145	BLACK_HILLS	15?	12.65	25	2	2	3	PE2	normal	_	_	_
39.5055	-117.682	49	DESATOYA_W	17?	13	20	0.8	0.7	0.9	MRE	normal	_	_	_
39.0288	-117.204	59	TOYABE_E	17?	10	28	0.5	0.4	0.6	MRE	normal	_	_	_
40.3988	-112.667	85	STANSBURY_sum_ 3_segments	17?	15	18	2.25	1.9	2.5	Penultimate	normal	_	_	_
39.8161	-113.429	50	Fish_springs	17.4?	13	18	0.825 ?	0.8 ?	0.85 ?	_	normal	_	_	_
37.4019	-118.647	153	Round_valley	18?	17	20	1.8?	1.3 ?	2?	_	normal	_	_	_
36.2947	-115.921	142	WEST_SPRING	20?	18	25 ?	1.9	1.8	2	MRE	normal	_	_	_
35.9313	-114.939	145	BLACK_HILLS	21?	12.65	25	1.4	1.2	1.6	PE4	normal	_	_	_
37.4019	-118.647	153	Round_valley	3?	2	4	1.8?	1.3 ?	2?	_	normal	_	_	_
39.7671	-115.305	47	BUTTE	30?	20	40	1.1 ?	0.95	1.3	Penultimate	normal	_	_	_
41.7787	-112.559	152	Promontory	4?	2	6	2.25 ??	2 ?	2.5 ?	_	normal	_	_	_
39.6197	-119.916	80	PEAVINE_PEAK	4.2?	4	6	2	1	2	event 2	normal	_	_	_
39.5055	-117.682	49	DESATOYA_W	40?	30	50	0.6?	0.5 ?	0.9?	Penultimate	normal	_	_	_
39.0288	-117.204	59	TOYABE_E	40?	30?	77.5?	1.5	1.4	1.6	Penultimate	normal	_	_	_
39.2541	-116.27	46	ANTELOPE	50?	40?	60?	1?	0.8?	1.5?	Penultimate	normal	_	_	_
39.8721	-116.602	57	SIMPSON_PARK	50?	40?	105?	2 ?	1.75?	4.2?	Penultimate	normal	_	_	_
37.4019	-118.647	153	Round_valley	6?	5	7	1.8?	1.3 ?	2?	_	normal	_	_	_
39.6197	-119.916	80	PEAVINE_PEAK	6.4?	6	8	1	0.5	1	event 3	normal	_	_	_
39.5055	-117.682	49	DESATOYA_W	60?	50	77.5	1.1?	1 ?	1.3?	Antepenultimate	normal	_	_	_
39.7671	-115.305	47	BUTTE	60?	50?	77.5?	3.1?	3	3.5	Oldest event	normal	_	_	_
39.603	-117.776	70	CLAN_ALPINE	60?	40 ?	90 ?	1.65 ?	1.5	2	PE 3	normal	_	_	_
40.3988	-112.667	85	STANSBURY_sum_ 3_segments	7?	6	10	4.15	3.6	4.6	MRE	normal	_	_	_
39.2541	-116.27	46	ANTELOPE	70?	60?	105	1?	0.8?	1.5?	Antepenultimate	normal	_	_	_
41.7787	-112.559	152	Promontory	8?	6	10	2.25 ??	2 ?	2.5 ?	_	normal	_	_	_
39.2543	-118.324	81	Sand_Springs_La_Plata	8.5?	7.3	13.3	2 ?	1.9 ?	2.1 ?	Penultimate	normal	_	_	_
39.8161	-113.429	50	Fish_springs	8.7?	4.8	13	0.825 ?	0.8 ?	0.85 ?	_	normal	_	_	_
39.6197	-119.916	80	PEAVINE_PEAK	8.8?	8	10	2	1	2	event 4	normal	_	_	_
41.0086	-115.24	154	Ruby_Wmountain	80?	60	124.5	2.5 ?	1 ?	2.5 ?	Penultimate	normal	_	_	_
40.1991	-119.037	83	Shawave_BlueWing	80?	60	125	3.3?	2?	4 ?	Penultimate	normal	_	_	_
37.4019	-118.647	153	Round_valley	9?	8	10	1.8?	1.3 ?	2?	_	normal	_	_	_
40.9173	-117.683	7	Sonoma	90?	60	140	3.25 ?	2?	4.5?	Penultimate	normal	_	_	_
