# Supplementary material
Source: publisher figshare collection journal article supplement (https://gsapubs.figshare.com/ndownloader/files/22410099)
Supplement: Supplementary file 1 [file 22410099 › Recurrence_intervals.xlsx]

## Sheet: RECURRENCE_TIME_data_normal
														Multi-earthquakes faults					Only one earthquake or datum data per fault
																								BINS	COUNT	FREQUENCY (%)	PT POSITION	Nb data
Index	FAILLE	OFFSET PER EVENT (m)	disp inf	disp sup	CUMULATIVE offset (m)	inf	sup	Age of Feature offset	Age of earthquke (ka)	Uncertainties inf	Uncertainty_sup	Earthquake chronology	COMMENTS	Recurrence interval (kyr)	Recurrence interval minimum	Recurrence interval maximum	Negative error	Positive error	Minimum recurrence interval (kyr)	Negative_error	Positive_error			0
1	Drum_Mountains	3.7	3.6	3.8	3.7	3.6	3.8	0	9	6.75	13.5	MRE		_	_	_	_	_	9	2.25	4.5			1	14	12.2807	0--1	114
2	EGAN	2.2	2.1	2.3	2.2	2.1	2.3	0	51	42	60	1 event		_	_	_	_	_	51	9	9			3	36	31.5789	1--3
3	FISH_CREEK	2.5	2.3	2.7	2.5	2.3	2.7	0	28.9	28	29.7	MRE		_	_	_	_	_	28.9	0.9	0.8			6	20	17.5439	3--6	MEAN	10.6095
4	HOUSE_range	1.4	1.3	1.5	1.4	1.3	1.5	0	15.5	12	19	At least 1 event		_	_	_	_	_	15.5	3.5	3.5			10	12	10.5263	6--10	Min	0.5
5	MONITOR_W	1.7	1.5	1.9	1.7	1.5	1.9	0	44	34	54	MRE		_	_	_	_	_	44	10	10			20	13	11.4035	10--20	Max	85.5
6	Pequops	2.9	2.8	3	2.9	2.8	3	0	42	32	52	MRE		_	_	_	_	_	42	10	10			30	6	5.26316	20--30	dev	17.1701
7	Sonoma	4.5	4.4	4.6	4.5	4.4	4.6	0	20.027	19.353	20.701	MRE		69.973	39.299	120.647	30.674	50.674	_	_	_			40	5	4.38596	30--40
7	Sonoma	3.25 ?	2?	4.5?	7.8?	6.4?	9.2?	0	90	60	140	Penultimate		_	_	_	_	_	_	_	_			50	3	2.63158	40--50
8	Stillwater_Seismic_Gap	3	2	4	3	2	4	0	2.25	2	2.5	MRE (The bend event)	*See footnotes	_	_	_	_	_	9.5	9.5	?			100	5	4.38596	50--100
8	Stillwater_Seismic_Gap	_	_	_	3	2	4	12	DATUM*	12	12	1 event		_	_	_	_	_	_	_	_
9	TOQUIMA_NORTH	1.1	1	1.2	1.1	1	1.2	0	16	6	26	1 event	*See footnotes	_	_	_	_	_	34	10	65
9	TOQUIMA_NORTH	_	_	_	1.1	1	1.2	77.5	DATUM*	50	105	1 event		_	_	_	_	_	_	_	_
10	TOQUIMA_SOUTH	3	2.8	3.2	3	2.8	3.2	0	57.75	55	60.5	1 event		_	_	_	_	_	57.75	2.75	2.75
11	West_Stillwater	5	4.9	5.1	5	4.9	5.1	0	6.225	5.6	6.85	MRE		_	_	_	_	_	6.225	0.625	0.625			SUM	114	100
12	Bradys	2	1.8	2.2	2	1.8	2.2	0	7.75	0	15.5	MRE		_	_	_	_	_	7.75	7.75	7.75
32	MONITOR_E	2	1.8	2.2	2	1.8	2.2	77.5	DATUM*	50	105	1 event	*See footnotes	_	_	_	_	_	25	0	25
40	STEENS_alvord	1.5	1.5	1.7	1.5	1.5	1.7	0	6.274	0.248	12.3	MRE		_	_	_	_	_	6.274	6.026	6.026
43	WASSUK_RANGE	1.15	1	1.3	1.15	1	1.3	0	0.325	0.1	0.55	MRE		5.02	0.84	9.2	4.18	4.18	_	_	_
43	WASSUK_RANGE	1.6	1.3	2	2.75	2.3	3.3	0	5.345	1.39	9.3	Penultimate		_	_	_	_	_	_	_	_
44	WEST_VALLEY	0.6	0.5	0.7	0.6	0.5	0.7	0	1.5	1.3	1.7	MRE		0.65	0.2	1.1	0.45	0.45	_	_	_
44	WEST_VALLEY	0.6	0.5	0.7	1.2	1	1.4	0	2.15	1.9	2.4	Penultimate		3.35	2.3	4.4	1.05	1.05	_	_	_
44	WEST_VALLEY	0.5	0.4	0.6	1.7	1.4	2	0	5.5	4.7	6.3	BL1		6.8	4.9	8.7	1.9	1.9	_	_	_
44	WEST_VALLEY	0.5	0.4	0.6	2.2	1.8	2.6	0	12.3	11.2	13.4	BL2		0.7	0	2.9	0.7	2.2	_	_	_
44	WEST_VALLEY	0.5	0.4	0.6	2.7	2.2	3.2	0	13	11.9	14.1	BL3		2.7	0	7.2	2.7	4.5	_	_	_			BINS	COUNT	FREQUENCY (%)	PT POSITION	Nb data
44	WEST_VALLEY	0.5	0.4	0.6	3.2	2.6	3.8	0	15.7	12.3	19.1	BL4		_	_	_	_	_	_	_	_			0
46	ANTELOPE	1.65	1.6	1.7	1.65	1.6	1.7	0	18	15	21	MRE		32	19	45	13	13	_	_	_			1	1	2.7027	0--1	37
46	ANTELOPE	1?	0.8?	1.5?	2.7	2.4?	3.2?	0	50	40	60	Penultimate		20	0	37.5	20	17.5	_	_	_			3	5	13.5135	1--3
46	ANTELOPE	1?	0.8?	1.5?	3.7	3.6?	4?	0	70	50	77.5	Antepenultimate		_	_	_	_	_	_	_	_			6	5	13.5135	3--6	MEAN	14.9813
47	BUTTE	1.125	0.95	1.3	1.125	0.95	1.3	77.5	20	18	22	MRE		10	8	32	2	22	_	_	_			10	11	29.7297	6--10	Min	0.018
47	BUTTE	1.1 ?	0.95	1.3	2.2	1.9	2.6	0	30	30	50	Penultimate		30	0	47.5	30	17.5	_	_	_			20	5	13.5135	10-20	Max	57.75
47	BUTTE	3.1?	3	3.5	5.3	5	5.5	0	60	50	77.5	Oldest event		_	_	_	_	_	_	_	_			30	3	8.10811	20--30	dev	15.2447
48	Crickett_Mountains	0.65 ?	0.6 ?	0.7 ?	0.65	0.6	0.7	16.5	8.4	0	16.8	MRE		_	_	_	_	_	8.4	8.4	8.4			40	3	8.10811	30--40
49	DESATOYA_W	0.8	0.7	0.9	0.8	0.7	0.9	0	17	13	20	MRE		23	0	27	23	4	_	_	_			50	2	5.40541	40--50
49	DESATOYA_W	0.6?	0.5 ?	0.9?	1.4	1.2	1.8	0	40	20	40	Penultimate		20	10	57.5	10	37.5	_	_	_			100	2	5.40541	50--100
49	DESATOYA_W	1.1?	1 ?	1.3?	2.5	2.2	3.1	0	60	50	77.5	Antepenultimate		_	_	_	_	_	_	_	_			100	0	0
50	Fish_springs	0.825 ?	0.8	0.85	0.825	0.8	0.85	0	3.4	2	4.8	MRE		5.3	0	11	5.3	5.7	_	_	_					0
50	Fish_springs	0.825 ?	0.8 ?	0.85 ?	1.65	1.6	1.7	0	8.7	4.8	13	0		4.3	0	12.2	4.3	7.9	_	_	_					0
50	Fish_springs	0.825 ?	0.8 ?	0.85 ?	2.475	2.4	2.55	0	13	8.7	17	0		4.4	0	9.3	4.4	4.9	_	_	_				37	100
50	Fish_springs	0.825 ?	0.8 ?	0.85 ?	3.3	3.2	3.4	0	17.4	13	18	0		_	_	_	_	_	_	_	_
51	HURRICANE_Anderson_SHIVWITZ	0.6	0.5	0.7	0.6	0.5	0.7	0	7.5	5	10	MRE		_	_	_	_	_	7.5	2.5	2.5
52	HURRICANE_CEDAR	2.75	2.5	3	2.75	2.5	3	0	10	8	12	MRE		_	_	_	_	_	10	2	2
53	HURRICANE_whitmore_Canyon	2.78	2.32	3.24	2.78	2.32	3.24	0	10	5	15	MRE		_	_	_	_	_	10	5	5
55	SCHELL_CREEK	1.9	1.8	2.2	1.9	1.8	2.2	13	6.5	0	13	MRE		25.5	17	35	8.5	9.5	_	_	_
55	SCHELL_CREEK	3.7	3.6	3.85	5.6	5.4	6.05	0	32	30	35	Penultimate		_	_	_	_	_	_	_	_
56	SCIPIO_LITTLEVALLEY	2.7	2.6	2.8	2.7	2.6	2.8	0	2.5	2	3	MRE		_	_	_	_	_	2.5	0.5	0.5
57	SIMPSON_PARK	4.2	4.1	4.3	4.2	4.1	4.3	13	6.5	0	13	MRE		43.5	27	105	16.5	61.5	_	_	_
57	SIMPSON_PARK	2 ?	1.75?	4.2?	6.2 ?	5	8.6	0	50	40	105	Penultimate		_	_	_	_	_	_	_	_
58	Snake_Deep_creek_valley	2.4	2.3	2.5	2.4	2.3	2.5	0	7.5	0	15	at least 1 event		_	_	_	_	_	7.5	7.5	7.5
59	TOYABE_E	0.5	0.4	0.6	0.825	0.725	0.925	post stage II+ of carbonate soil development, Latest Pleistocene,	17	13	20	MRE		23	10	64.5	13	41.5	_	_	_
59	TOYABE_E	1.5	1.4	1.6	3.3	3.2	3.4	0	40	30	77.5	Penultimate		_	_	_	_	_	_	_	_
60	WEST_TAHOE	3.65	2.8	4.5	3.65	2.8	4.5	0	4.3	4.1	4.5	MRE		_	_	_	_	_	4.3	0.2	0.2
61	1915_Pleasant_Valley	3.5	3	4	3.5	3	4	0	0.035	0.035	0.035	MRE		10.915	6.865	14.965	4.05	4.05	_	_	_
61	1915_Pleasant_Valley	2.6	2.5	2.7	6.1	5.5	6.7	0	10.95	6.9	15	Penultimate		_	_	_	_	_	_	_	_
64	1932_GABBS_VALLEY	0.2	0.1	0.3	0.2	0.1	0.3	0	0.018	0.018	0.018	MRE		_	_	_	_	_	0.018	0	0
65	1954_Dixie_valley	2.8	2.5	3.2	2.8	2.5	3.2	0	-0.004	-0.004	-0.004	MRE		2.254	2.004	2.504	0.25	0.25	_	_	_
65	1954_Dixie_valley	3	2	4	5.8	4.5	7.2	0	2.25	2	2.5	Penultimate, "The Bend"		21.95	10.5	33.4	11.45	11.45	_	_	_
65	1954_Dixie_valley	2.75	2.5	3	8.55	7	10.2	0	24.2	13	35.4	“IXL” event		_	_	_	_	_	_	_	_
67	1954_Rainbow_stillwater	0.3	0.2	0.4	0.3	0.2	0.4	0	-0.004	-0.004	-0.004	MRE		8.154	6.304	10.004	1.85	1.85	_	_	_
67	1954_Rainbow_stillwater	1.5	1.4	1.6	1.8	1.7	1.9	0	8.15	6.3	10	Penultimate		6.65	1.8	11.5	4.85	4.85	_	_	_
67	1954_Rainbow_stillwater	1.2	1.2	1.5	3	3	4	0	14.8	11.8	17.8	Older event		_	_	_	_	_	_	_	_
68	ANTELOPE_VALLEY	3.6	3.5	3.7	3.6	3.5	3.7	0	1.35	1.312	1.414	MRE		4.9	4.782	8.688	0.118	3.788	_	_	_
68	ANTELOPE_VALLEY	3.1	3	3.2	6.7	6.5	6.9	0	6.25	6.196	10	Penultimate		_	_	_	_	_	_	_	_
69	CARSON_RANGE_MT_ROSE	1.75 ?	1	2.5	1.75	1	2.5	0	0.8415	0.729	0.954	MRE		1.271	0.589	1.953	0.682	0.682	_	_	_
69	CARSON_RANGE_MT_ROSE	1.75 ?	1	2.5	3.5	2	5	0	2.1125	1.543	2.682	Penultimate		6.3905	5.735	7.046	0.6555	0.6555	_	_	_
69	CARSON_RANGE_MT_ROSE	1.75 ?	1	2.5	5.25	3	7.5	8.503	8.503	8.417	8.589	P3		6.497	0	19.583	6.497	13.086	_	_	_
69	CARSON_RANGE_MT_ROSE	1.75 ?	1	2.5	7	4	10	0	15	8.4	28	P4		_	_	_	_	_	_	_	_
70	CLAN_ALPINE	1?	0.8	1.2	1	0.8	1.2	0	9	8	10	MRE, PE1		19	15	23	4	4	_	_	_
70	CLAN_ALPINE	2 ?	1.7	2.3	4	3.4	4.6	0	28	25	31	Penultimate, PE 2		32	9	65	23	33	_	_	_
70	CLAN_ALPINE	1.65 ?	1.5	2	5.65	4.9	6.6	0	60	40	90	PE 3		40	0	90	40	50	_	_	_
70	CLAN_ALPINE	1.65 ?	1.5	2	7.3	6.4	8.6	0	100	90	130	PE 4		_	_	_	_	_	_	_	_
71	Crescent	4.6	4.2	5	4.6	4.2	5	0	2.795	2.245	3.345	MRE		_	_	_	_	_	2.795	0.55	0.55
72	Dry_Hills	0.3	0.2	0.4	0.3	0.2	0.4	5.733	2.8665	0	5.733	MRE		13.3335	6.767	19.9	6.5665	6.5665	_	_	_
72	Dry_Hills	1.5	1.4	1.6	1.8	1.6	2	0	16.2	12.5	19.9	Penultimate		11.8	7.1	16.5	4.7	4.7	_	_	_
72	Dry_Hills	1.5	1.4	1.6	3.3	3	3.6	0	28	27	29	Older earthquake		_	_	_	_	_	_	_	_
73	EASTGATE	1.3	1.2	1.4	1.3	1.2	1.4	0	5	4.8	5.2	MRE, PE1		14	12.8	15.2	1.2	1.2	_	_	_
73	EASTGATE	2.15	2.1	2.2	3.45	3.3	3.6	0	19	18	20	P2		6	4	8	2	2	_	_	_
73	EASTGATE	1.95	1.9	2	5.4	5.2	5.6	0	25	24	26	P3		6	5	35	1	29	_	_	_
73	EASTGATE	1.3	1.1	2	6.7	6.3	7.6	0	31	31	59	P4		_	_	_	_	_	_	_	_
74	GENOA	4.25	3	5.5	4.25	3	5.5	0	0.55	0.5	0.6	MRE		1.55	1.4	1.7	0.15	0.15	_	_	_
74	GENOA	4.3?	3?	5.5?	8.55	6	11	0	2.1	2	2.2	Penultimate		_	_	_	_	_	_	_	_
75	GreatLake_Antelope	5.5	4.7	6	5.5	4.7	6	0	0.586	0.345	0.787	MRE		5.584	5.149	6.061	0.435	0.477	_	_	_
75	GreatLake_Antelope	2.3	1.7	2.9	7.8	6.4	8.9	0	6.17	5.936	6.406	Y		3.728	3.19	4.209	0.538	0.481	_	_	_
75	GreatLake_Antelope	2.3 ?	1.7?	2.9 ?	10.1	8.1	11.8	0	9.898	9.596	10.145	X		_	_	_	_	_	_	_	_
76	GreatLake_Fremont	5.5 ?	4.7	6	5.5	4.7	6	0	3.15	2.939	3.385	MRE		3.262	2.816	3.682	0.446	0.42	_	_	_
76	GreatLake_Fremont	2.3	1.7	2.9	7.8	6.4	8.9	0	6.412	6.201	6.621	Y		2.9145	0	5.831	2.9145	2.9165	_	_	_
76	GreatLake_Fremont	2.3 ?	1.7?	2.9 ?	10.1	8.1	11.8	0	9.3265	6.621	12.032	X		_	_	_	_	_	_	_	_
77	Humboldt_range	2	1.8	2.2	2	1.8	2.2	0	4.626	4.445	4.807	MRE		30.374	20.193	40.555	10.181	10.181	_	_	_
77	Humboldt_range	2.7	2.6	2.8	4.7	4.4	5	0	35	25	45	penultimate		_	_	_	_	_	_	_	_
78	Malpais	0.7	0.7	0	0.7	0.7	0	0	7.45	7.338	7.562	MRE		11.251	10.557	11.945	0.694	0.694	_	_	_
78	Malpais	2	2	0	2.7	2.7	0	0	18.701	18.119	19.283	Penultimate		_	_	_	_	_	_	_	_
79	OQUIRRH	2.45	2.2	2.7	2.45	2.2	2.7	0	6.35	4.8	7.9	MRE		16.935	12.47	21.4	4.465	4.465	_	_	_
79	OQUIRRH	2.3	2.3	2.3	4.75	4.5	5	0	23.285	20.37	26.2	penultimate		31.715	6.59	39.63	25.125	7.915	_	_	_
79	OQUIRRH	2.3 ?	1.5 ?	3.1 ?	7.05	6	8.1	0	55	32.79	60	antepenultimate Vertical offset unkwonm		_	_	_	_	_	_	_	_
80	PEAVINE_PEAK	0.5	0.4	0.6	0.5	0.4	0.6	0	2	0	2	MRE		2.2	2	6	0.2	3.8	_	_	_
80	PEAVINE_PEAK	1.75 ?	1.5 ?	2 ?	2.25	1.9	2.6	0	4.2	4	6	0		2.2	0	4	2.2	1.8	_	_	_
80	PEAVINE_PEAK	1.75 ?	1.5 ?	3 ?	4	3.4	4.6	0	6.4	6	8	0		2.4	0	4	2.4	1.6	_	_	_
80	PEAVINE_PEAK	1.75 ?	1.5 ?	4 ?	5.75	4.9	6.6	0	8.8	8	10	0		2.2	0	4	2.2	1.8	_	_	_
80	PEAVINE_PEAK	1.75 ?	1.5 ?	5 ?	7.5	6.4	8.6	0	11	10	12	0		_	_	_	_	_	_	_	_
81	Sand_Springs_La_Plata	2	1.9	2.1	2	1.9	2.1	0	3.4	3	4	MRE		5.1	3.3	10.3	1.8	5.2	_	_	_
81	Sand_Springs_La_Plata	2 ?	1.9 ?	2.1 ?	4	3.8	4.2	0	8.5	7.3	13.3	Penultimate		2.5	0	6	2.5	3.5	_	_	_
81	Sand_Springs_La_Plata	2 ?	1.9 ?	2.1 ?	6	5.5	6.5	0	11	7.3	13.3	Antepenultimate		_	_	_	_	_	_	_	_
82	Santa_Rosa	1.9	1	2.8	1.9	1	2.8	0	13.5	11	16	MRE		85.5	74	97	11.5	11.5	_	_	_
82	Santa_Rosa	1.9 ?	1 ?	2.8 ?	3.8	2	5.6	0	99	90	108	Penultimate		41	17	65	24	24	_	_	_
82	Santa_Rosa	1.9 ?	2 ?	2.8 ?	5.7	3	8.4	0	140	125	155	Antepenultimate		_	_	_	_	_	_	_	_
83	Shawave_BlueWing	3.3	3	4	3.3	3	4	0	5.453	1.899	7.777	MRE		74.547	52.223	103.101	22.324	28.554	_	_	_
83	Shawave_BlueWing	3.3?	3 ?	4 ?	6.6	6	8	0	80	60	105	Penultimate		_	_	_	_	_	_	_	_
84	Shoshone	0.4	0.3	0.5	0.4	0.3	0.5	0	3.317	2.953	3.681	MRE		_	_	_	_	_	3.317	0.364	0.364
85	STANSBURY_sum_ 3_segments	4.15	3.6	4.6	4.15	3.6	4.6	0	7	6	10	MRE		10	5	12	5	2	_	_	_
85	STANSBURY_sum_ 3_segments	2.25	1.9	2.5	6.4	5.5	7.1	0	17	15	18	Penultimate		_	_	_	_	_	_	_	_
86	STEENS_southern	2.2	1.7	2.7	2.2	1.7	2.7	0	4.6	3.6	5.6	MRE		1.5	0	3	1.5	1.5	_	_	_
86	STEENS_southern	1.1	1	1.2	3.3	2.7	3.9	0	6.1	5.6	6.6	Penultimate		5.4	2.9	7.9	2.5	2.5	_	_	_
86	STEENS_southern	1.1	1	1.2	4.4	3.7	5.1	0	11.5	9.5	13.5	Antepenultimate		_	_	_	_	_	_	_	_
87	WASATCH_Brigham_segment	2.1	1.9	2.3	2.1	1.9	2.3	0	2.42	2.16	2.68	B1, Z		1.01	0.6	1.42	0.41	0.41	_	_	_
87	WASATCH_Brigham_segment	1	0.9	1.1	3.1	2.8	3.4	0	3.43	3.28	3.58	B2, Y		1.02	0.33	1.71	0.69	0.69	_	_	_
87	WASATCH_Brigham_segment	2.5	2.4	2.6	5.6	5.2	6	0	4.45	3.91	4.99	B3,X		1.15	0	2.35	1.15	1.2	_	_	_
87	WASATCH_Brigham_segment	2.5	2.4	2.6	8.1	7.6	8.6	0	5.6	4.94	6.26	B4,W		1.9	0.24	3.56	1.66	1.66	_	_	_
87	WASATCH_Brigham_segment	1.65	1.5	1.8	9.75	9.1	10.4	0	7.5	6.5	8.5	V		1	0	3.5	1	2.5	_	_	_
87	WASATCH_Brigham_segment	2.35	2.2	2.5	12.1	11.3	12.9	0	8.5	7	10	U		6.8	3.6	10	3.2	3.2	_	_	_
87	WASATCH_Brigham_segment	2.3 ?	2	2.5	14.4	13.3	15.4	0	15.3	13.6	17	T		_	_	_	_	_	_	_	_
88	WASATCH_Salt_Lake_City_segment	1.75 ?	1.5	2.03333	1.75	1.5	2	0	1.3	1.1	1.5	S1		0.9	0.5	1.3	0.4	0.4	_	_	_
88	WASATCH_Salt_Lake_City_segment	1.75 ?	1.5	2.03333	3.5	3	4	0	2.2	2	2.4	S2		1.9	1.5	2.3	0.4	0.4	_	_	_
88	WASATCH_Salt_Lake_City_segment	1.75 ?	1.5	2.03333	5.3	4.7	6.1	0	4.1	3.9	4.3	S3		1.2	0.8	1.6	0.4	0.4	_	_	_
88	WASATCH_Salt_Lake_City_segment	1.3	1.2	1.5	6.6	5.9	7.6	0	5.3	5.1	5.5	S4		2.4	1.8	3	0.6	0.6	_	_	_
88	WASATCH_Salt_Lake_City_segment	1.2	0.8	1.5	7.8	6.7	9.1	0	7.7	7.3	8.1	S5		1.8	1.1	2.5	0.7	0.7	_	_	_
88	WASATCH_Salt_Lake_City_segment	1.5	1.2	1.8	9.3	7.9	10.9	0	9.5	9.2	9.8	S6		1.4	0.9	1.9	0.5	0.5	_	_	_
88	WASATCH_Salt_Lake_City_segment	1.5	1.2	1.8	10.1	8.3	12.1	0	10.9	10.7	11.1	S7		1.7	0.3	3.1	1.4	1.4	_	_	_
88	WASATCH_Salt_Lake_City_segment	1.4	1	1.8	11.5	9.3	13.9	0	12.6	11.4	13.8	S8		3.65	0.8	6.5	2.85	2.85	_	_	_
88	WASATCH_Salt_Lake_City_segment	1.5	1.2	1.8	13	10.5	15.7	0	16.25	14.6	17.9	S9		_	_	_	_	_	_	_	_
89	WASATCH_Levan_segment	2.4	1.8	3	2.4	1.8	3	0	1	0.85	1.15	MRE	not reliable	_	_	_	_	_	_	_	_
89	WASATCH_Levan_segment	2	1.8	2.2	4.4	3.6	5.2	0	4.825	4.825	unknown, 30?	Penultimate		_	_	_	_	_	_	_	_
90	WASATCH_Nephi_segment_northern_strand	3	2.8	3.2	3	2.8	3.2	0	0.4	0.3	0.5	S1		0.5	0.2	0.8	0.3	0.3	_	_	_
90	WASATCH_Nephi_segment_northern_strand	1	0.7	1.3	4	3.5	4.5	0	0.9	0.7	1.1	SL1		2	1.1	2.9	0.9	0.9	_	_	_
90	WASATCH_Nephi_segment_northern_strand	1	0.7	1.3	5	4.2	5.8	0	2.9	2.2	3.6	SL2		1.1	0	2.3	1.1	1.2	_	_	_
90	WASATCH_Nephi_segment_northern_strand	1	0.7	1.3	6	4.9	7.1	0	4	3.5	4.5	SL3		0.8	0	2.1	0.8	1.3	_	_	_
90	WASATCH_Nephi_segment_northern_strand	1	0.7	1.3	7	5.6	8.4	0	4.8	4	5.6	SL4		0.9	0	2.5	0.9	1.6	_	_	_
90	WASATCH_Nephi_segment_northern_strand	1	0.7	1.3	8	6.3	9.7	0	5.7	4.9	6.5	SL5		0.9	0	2.4	0.9	1.5	_	_	_
90	WASATCH_Nephi_segment_northern_strand	1	0.7	1.3	9	7	11	0	6.6	5.9	7.3	Sl6		6.5	1.8	11.2	4.7	4.7	_	_	_
90	WASATCH_Nephi_segment_northern_strand	1	0.7	1.3	10	7.7	12.3	0	13.1	9.1	17.1	SL7		_	_	_	_	_	_	_	_
91	WASATCH_Nephi_segment_southern_strand	2.1	2	2.2	2.1	2	2.2	0	0.55	0.1	1	NC1-RC1		0.65	0.1	1.2	0.55	0.55	_	_	_
91	WASATCH_Nephi_segment_southern_strand	2.25	2	2.5	4.35	4	4.7	0	1.2	1.1	1.3	NC2		0.7	-2.22045e-16	1.4	0.7	0.7	_	_	_
91	WASATCH_Nephi_segment_southern_strand	1.7	1.4	2	6.05	5.4	6.7	0	1.9	1.3	2.5	NC3, WC3		2.1	1.4	2.8	0.7	0.7	_	_	_
91	WASATCH_Nephi_segment_southern_strand	2 ?	1.4	2.5	8.05	6.8	9.2	0	4	3.9	4.1	NC4		0.7	0	1.5	0.7	0.8	_	_	_
91	WASATCH_Nephi_segment_southern_strand	2 ?	1.4	2.5	10.05	8.2	11.7	0	4.7	4	5.4	NC5		_	_	_	_	_	_	_	_
92	WASATCH_Provo_segment	4.7	4.2	5.2	4.7	4.2	5.2	0	0.58	0.08	1.08	Z, P1		0.9	0.02	1.78	0.88	0.88	_	_	_
92	WASATCH_Provo_segment	3.25	2.2	4.3	7.95	6.4	9.5	0	1.48	1.1	1.86	Y, P2		0.76	-0.03	1.55	0.79	0.79	_	_	_
92	WASATCH_Provo_segment	2.45	2.2	2.7	10.4	8.6	12.2	0	2.24	1.83	2.65	X,P3		2.47	1.77	3.17	0.7	0.7	_	_	_
92	WASATCH_Provo_segment	1.95	1.6	2.3	12.35	10.2	14.5	0	4.71	4.42	5	P4		0.93	0.23	2.5	0.7	1.57	_	_	_
92	WASATCH_Provo_segment	2?	1.6	2.3	14.35	11.8	16.8	0	5.64	5.23	6.92	P5		_	_	_	_	_	_	_	_
93	WASATCH_Weber_segment	0.65	0.5	0.8	0.65	0.5	0.8	0	0.6	0.5	0.7	E1		0.5	0	1.2	0.5	0.7	_	_	_
93	WASATCH_Weber_segment	2.6	2.3	2.9	3.25	2.8	3.7	0	1.1	0.5	1.7	E2		2	1.1	2.9	0.9	0.9	_	_	_
93	WASATCH_Weber_segment	4.2	3.9	4.5	7.45	6.7	8.2	0	3.1	2.8	3.4	E3, B		1.4	0.8	2	0.6	0.6	_	_	_
93	WASATCH_Weber_segment	4.2	3.9	4.5	11.65	10.6	12.7	0	4.5	4.2	4.8	E4, A		1.4	0.6	2.2	0.8	0.8	_	_	_
93	WASATCH_Weber_segment	1.4	1.1	1.7	13.05	11.7	14.4	0	5.9	5.4	6.4	E5		_	_	_	_	_	_	_	_
94	WEST_Dry_Lake	0.75	0.5	1	0.75	0.5	1	_	2.5	0	5	MRE		_	_	_	_	_	2.5	2.5	2.5
99	Beaver_basin_E	2	1	3	2	1	3	13.5	7.5	0	15	MRE		_	_	_	_	_	7.5	7.5	7.5
105	KAWICH_RANGE_WEST_SC	0.3	0.2	0.4	0.3	0.2	0.4	Early Holocene	9	9	18	MRE		_	_	_	_	_	9	0	9
107	KEANE	1.8	1.6	2	1.8	1.6	2	6	4	0	8	MRE		_	_	_	_	_	4	4	4
130	White_river_valley	3	2.8	3.2	3	2.8	3.2	137	DATUM*	74	200	1 event	*See footnotes	_	_	_	_	_	37	0	37
131	Yucca_west	0.18	0.15	0.2	0.18	0.15	0.2	0	3	0	6	MRE ?		_	_	_	_	_	3	3	3
132	BELTED_RANGE	0.8	0.6	1	0.8	0.6	1	_	10	0	28	MRE		_	_	_	_	_	10	10	18
133	EGLINTON	0.38	0.38	1?	0.38	0.38	1?	0	2.245	2.15	2.34	PE1		_	_	_	_	_	2.245	0.095	0.095
135	Frenchman_mountain	2	1.5	2.5	2	1.5	2.5	0	70	10	130	MRE	no reliable	_	_	_	_	_	_	_	_
136	Hilton_Creek	2?	1.8?	2.5?	2	1.8	2.5	0	1.9	0	3.8	MRE		_	_	_	_	_	1.9	1.9	1.9
138	RAILROAD_VALLEY_CENTRAL	2	1.5	2.5	2	1.5	2.5	0	17.5	5	30	MRE		_	_	_	_	_	17.5	12.5	12.5
140	Smith_valley	3.5	3	4	3.5	3	4	0	3.53	3.448	5.306	MRE		_	_	_	_	_	3.53	0.082	1.776
141	WAH_WAH	0.3	0.2	0.4	0.3	0.2	0.4	0	7.5	0	15	MRE		_	_	_	_	_	7.5	7.5	7.5
142	WEST_SPRING	1.9	1.8	2	1.9	1.8	2	0	20	18	25	MRE		_	_	_	_	_	20	2	5
143	ASH_MEADOWS	1	0.2	1.8	1	0.2	1.8	40	17	16.8	50	MRE		83	0	113.2	83	30.2	_	_	_
143	ASH_MEADOWS	2.4 ?	2?	3?	3.4	3.2	3.6	100	100	30	130	Penultimate		_	_	_	_	_	_	_	_
144	Bear_River	3.65	2	5.3	3.65	2	5.3	0	2.37	1.32	3.42	MRE		2.25	0.51	3.99	1.74	1.74	_	_	_
144	Bear_River	3.65 ?	2	5.3	8.3	3.9	12.7	0	4.62	3.93	5.31	Penulitmate		_	_	_	_	_	_	_	_
145	BLACK_HILLS	1.75	1.5	2	1.75	1.5	2	0	6.415	2.25	10.58	MRE,PE1		8.585	2.07	22.75	6.515	14.165	_	_	_
145	BLACK_HILLS	2	2	3	3.75	3.5	5	0	15	12.65	25	PE2		2	0	12.35	2	10.35	_	_	_
145	BLACK_HILLS	1.45	0.8	1.6	5.2	4.3	6.6	0	17	12.65	25	PE3		4	0	12.35	4	8.35	_	_	_
145	BLACK_HILLS	1.4	1.2	1.6	6.6	5.5	8.2	0	21	12.65	25	PE4		4	0	13.35	4	9.35	_	_	_
145	BLACK_HILLS	2.5	1.5	3	9.1	7.59	12.965	0	25	24	26	PE5		_	_	_	_	_	_	_	_
148	Black_Rock	1.8	1.7	1.9	1.8	1.7	1.9	0	0.55	0	1.1	MRE		2.5	0	5	2.5	2.5	_	_	_
148	Black_Rock	1.8 ?	1.7	1.9	3.6	3.4	3.8	0	3.05	1.1	5	Penultimate		10.95	0	21.9	10.95	10.95	_	_	_
148	Black_Rock	0.5 ?	0	0	4?	3.5	4.5	0	14	5	23	0		10	0	20	10	10	_	_	_
148	Black_Rock	1.8 ?	0	0	6?	4	7	0	24	23	25	0		_	_	_	_	_	_	_	_
149	Bohnam_Ranch	2.9	2.8	2.9	2.9	2.8	2.9	0	0.29	0.22	0.36	MRE		6.71	1.64	11.78	5.07	5.07	_	_	_
149	Bohnam_Ranch	0.6	0.5	0.7	3.5	3.3	3.6	0	7	2	12	Penultimate		_	_	_	_	_	_	_	_
150	Hansel_valley	0.5	0.4	0.6	0.5	0.4	0.6	0	0.016	0.016	0.016	Penultimate		12.984	12.484	13.484	0.5	0.5	_	_	_
150	Hansel_valley	2.25 ??	2 ?	2.5 ?	2.75	2.4	3.1	0	13	12.5	13.5	one event		1.5	0.5	2.5	1	1	_	_	_
150	Hansel_valley	2.25 ??	2 ?	2.5 ?	5	4.4	5.6	0	14.5	14	15	one event		15.5	11	44	4.5	28.5	_	_	_
150	Hansel_valley	2.25 ??	2 ?	2.5 ?	7.25	6.4	8.1	0	30	26	58	one event		_	_	_	_	_	_	_	_
152	Promontory	2.25 ??	2 ?	2.5 ?	2.25	2	2.5	0	4 ?	2	6	0		_	_	_	_	_	_	_	_
152	Promontory	2.25 ??	2 ?	2.5 ?	4.5	4	5	0	8 ?	6	10	0		_	_	_	_	_	_	_	_
152	Promontory	2.25 ??	2 ?	2.5 ?	6.75	6	7.5	0	12 ?	10	14	0		_	_	_	_	_	_	_	_
153	Round_valley	1.8	1.3	2	1.8	1.3	2	0	1.5	0	3	MRE		1.5	0	4	1.5	2.5	_	_	_
153	Round_valley	1.8?	1.3 ?	2?	3.6	2.6	4	0	3	2	4	0		3	1	5	2	2	_	_	_
153	Round_valley	1.8?	1.3 ?	2?	5.4	3.9	6	0	6	5	7	0		3	1	5	2	2	_	_	_
153	Round_valley	1.8?	1.3 ?	2?	7.2	5.2	8	0	9	8	10	0		3	1	5	2	2	_	_	_
153	Round_valley	1.8?	1.3 ?	2?	9	6.5	10	0	12	11	13	0		3	1	5	2	2	_	_	_
153	Round_valley	1.8?	1.3 ?	2?	10.8	7.8	12	0	15	14	16	0		3	1	6	2	3	_	_	_
153	Round_valley	1.8?	1.3 ?	2?	12.6	9.1	14	0	18	17	20	0		_	_	_	_	_	_	_	_
154	Ruby_Wmountain	2.5	1	2.5	2.5	1	2.5	0	6.2	4.8	7.6	MRE		73.8	52.4	119.7	21.4	45.9	_	_	_
154	Ruby_Wmountain	2.5 ?	1 ?	2.5 ?	5?	2?	5?	0	80	60	124.5	Penultimate		_	_	_	_	_	_	_	_
156	Surprise_valley	2	1	3	2	1	3	0	1.2	1.1	1.3	MRE, P1		4.6	3	6.2	1.6	1.6	_	_	_
156	Surprise_valley	2	1	3	4	2	6	0	5.8	4.3	7.3	P2		2.7	0.7	4.7	2	2	_	_	_
156	Surprise_valley	3	2	4	7	4	10	0	8.5	8	9	P3		2.4	0	6.1	2.4	3.7	_	_	_
156	Surprise_valley	2	1	3	9	5	13	0	10.9	7.7	14.1	P4		7.3	1.5	13.1	5.8	5.8	_	_	_
156	Surprise_valley	4.5	3.5	5.5	13.5	8.5	18.5	0	18.2	15.6	20.8	PX		_	_	_	_	_	_	_	_
661	1954_Fairview_Peak	3.4	3	3.8	3.4	3	3.8	0	-0.004	-0.004	-0.004	MRE		_	_	_	_	_	35.404	0	57
661	1954_Fairview_Peak_Bell_Flat_only	3.1	3	3.2	6.5	6	7	0	92.7	35.4	150	Penultimate		_	_	_	_	_	_	_	_
	*For three faults, a minimum earthquake time reccurence has been estimated in another way, that permitted to be more accurate.
					Stillwater seismic gap: Only one earthquake has offset a surface of 12 ka. This earthquake occurred at 2.25ka (2.5 ka max). This yields a minimum reccurence time of 12-2.5=9.5 ka.
					Toquima north : Only one earthquake has offset an alluvial surface of 77.5 ka (50ka minimum age ). This earthquake occurred ca. 16ka. This yield a minimum reccurence time of 50-16= 34 ky.
					Monitor E: Only one earthquake has offset an alluvial surface dated 77.5 ka (50 ka minimum age). For example, if the most recent earthquake occurred yesterday, the minimum time reccurence would be 50 ky. But as we don't know when occurred the earthquake, we can only assess the minimum time reccurence which is 50/2= 25 ky.
					White River Valley: Same case than Monitor E, except that only one earthquake has offset a 74 ka alluvial surface. Minimum time reccurence is thus 74/2= 37 ky.

## Sheet: RECURRENCE_TIME_data_strikeslip
Fault index	FAULT NAME	DISPLACEMENT PER EVENT (m)	disp inf	disp sup	CUMULATIVE offset (m)	inf	sup	Age of Feature offset	Age of earthquke (ka)	Uncertainties inf	Uncertainty_sup	Earthquake	RAKE	Recurrence_Time (several earthquakes)	Recurrence min	Recurrence max	Minimum recurrence time	min	max
26	GARLOCK_central_and_eastern	7 ?	6	8	7	6	8	0	0.405	0.31	0.5	MRE, W	Senestral	0.7325	0.5	0.965	_	_	_
26	GARLOCK_central_and_eastern	7?	6	8	14	12	16	0	1.1375	1	1.275	U	Senestral	0.45	0.2	0.7	_	_	_
26	GARLOCK_central_and_eastern	4?	3	6	18	15	22	0	1.5875	1.475	1.7	R	Senestral	0.2125	0	0.45	_	_	_
26	GARLOCK_central_and_eastern	7?	6	8	25	21	30	0	1.8	1.675	1.925	Q	Senestral	3.285	2.955	3.615	_	_	_
26	GARLOCK_central_and_eastern	7?	6	8	32	27	38	0	5.085	4.88	5.29	K	Senestral	1.85	1.33	2.37	_	_	_
26	GARLOCK_central_and_eastern	7?	6	8	39	33	46	0	6.935	6.62	7.25	F	Senestral	_	_	_	_	_	_
54	PYRAMID_LAKE	5.9	4.4	7.4	5.9	4.4	7.4	0	0.99	0.98	1	MRE	dextral	3.75	0.88	6.62	_	_	_
54	PYRAMID_LAKE	5.9 ?	4.4	7.4	12	8.8	14.8	0	4.74	1.88	7.6	0	dextral	3.663	0	7.326	_	_	_
54	PYRAMID_LAKE	5.9 ?	4.4	7.4	18	13	22.2	0	8.403	7.6	9.206	0	dextral	3.95	0	7.9	_	_	_
54	PYRAMID_LAKE	5.9 ?	4.4	7.4	24	17	29.6	0	12.353	9.206	15.5	0	dextral	_	_	_	_	_	_
62	1932_MONTE_CRISTO	1.5	1	2	1.5	1	2	0	0.018	0.018	0.018	MRE	Dextral	3.982	1.982	5.982	_	_	_
62	1932_MONTE_CRISTO	1.5 ?	1 ?	2?	3	2	4	0	4	2	6	Y	Dextral	1	0	5	_	_	_
62	1932_MONTE_CRISTO	1.5 ?	2 ?	2?	4.5	3	6	0	5	3	7	X	Dextral	7	3	11	_	_	_
62	1932_MONTE_CRISTO	1.5 ?	3 ?	2?	6	4	8	0	12	10	14	W	Dextral	3	0	7	_	_	_
62	1932_MONTE_CRISTO	1.5 ?	4 ?	2?	7.5	5	10	0	15	13	17	V	Dextral	3	0	7	_	_	_
62	1932_MONTE_CRISTO	1.5 ?	5 ?	2?	9	6	12	0	18	16	20	U	Dextral	_	_	_	_	_	_
151	OWEN_valley	6	4	8	6	4	8	0	0.078	0.078	0.078	MRE	dextral	9.422	8.522	10.322	_	_	_
151	OWEN_valley	8.7	7.8	9.6	14.4	12.6	16.2	0	9.5	8.6	10.4	Penultimate	dextral	10.9	4.2	17.6	_	_	_
151	OWEN_valley	6?	4?	8?	20?	15?	25?	0	20.4	14.6	26.2	Antepenultimate	dextral	_	_	_	_	_	_
662	1954_Fairview_Peak	2.5	2	3	2.5	2	3	0	-0.004	-0.004	-0.004	MRE	dextral	_	_	_	35.4	35.4	150
662	1954_Fairview_Peak_Bell_Flat_only	2.5	2	3	5	4	6	0	92.7	35.4	150	Penultimate	dextral	_	_	_	_	_	_
160	Honey_Lake	7.95	5.3	10.6	7.95	5.3	10.6	4.67	2.4075	0	4.815	E1	dextral	2.6775	-0.29	5.645	_	_	_
160	Honey_Lake	?	_	_	_	_	_	5.56	5.085	4.525	5.645	E2	dextral	1	0	2.17	_	_	_
160	Honey_Lake	?	_	_	_	_	_	6.66	6.085	5.475	6.695	E3	dextral	0.7675	0	1.725	_	_	_
160	Honey_Lake	?	_	_	_	_	_	7.05	6.8525	6.505	7.2	E4	dextral	_	_	_	_	_	_
162	Olinghouse	2.875	2.75	3	2.875	2.75	3	1.935	1.0025	0	2.005	MRE	Senestral	2.1675	0.785	3.55	_	_	_
162	Olinghouse	2,8 ?	_	_	5,75 ?	5,5 ?	6?	3.36	3.17	2.79	3.55	Penultimate	Senestral	_	_	_	_	_	_
164	Mohawk	1,35 ?	1?	2?	1,35 ?	1?	2?		1.9	1.8	2	E1	dextral	3.8	0.7	6.9	_	_	_
164	Mohawk	1,35 ?	1?	2?	2.7	2.5	2.9		5.7	2.7	8.7	E2	dextral	7.1	2.7	11.5	_	_	_
164	Mohawk	?	?	?	?	?	?		12.8	11.4	14.2	E3	dextral	1.2	0	3.6	_	_	_
164	Mohawk	?	?	?	?	?	?		14	13	15	E4	dextral	_	_	_	_	_	_
