# Supplementary material
Source: publisher figshare collection journal article supplement (https://gsapubs.figshare.com/ndownloader/files/22410099)
Supplement: Supplementary file 1 [file 22410099 › Slip-rates.xlsx]

## Sheet: FINITE_SLIP-RATE
				FINITE AND TRANSIENT DISPLACEMENT RATE considering different TIME WINDOWS
FAULT INDEX	Finite Offset 15 ka (m)	Nature of offset 15 ka	Age datum 15ka (ka)	FINITE SLIP-RATE 15ka* (mm/yr)	Finite Offset 80ka (m)	Datum age 80ka (ka)	FINITE SLIP-RATE 80ka (mm/yr)	Finite OFFSET 150 ka (m)	Age datum 150 ka (ka)	FINITE SLIP-RATE 150ka (mm/yr)	Finite Offset 500ka (m)	Datum age 500ka (ka)	FINITE SLIP-RATE 500 ka (mm/yr)	Finite Offset 1Ma (m)	Datum age 1Ma (ka)	FINITE SLIP-RATE 1Ma (mm/yr)	INTERVAL SLIP-RATE between 15 and 80 ka	INTERVAL SLIP-RATE between 80 and 150 ka	INTERVAL SLIP-RATE between 15 and 150 ka
1	7.3	datum	13.5	0.540741
2	0	0 eq	15	0	2.2	77.5	0.0283871	15	200	0.075							0.0352	0.10449	0.0810811
3	0	0 eq	15	0	2.5	77.5	0.0322581	8	200	0.04							0.04	0.044898	0.0432432
4	1.4	at least 1eq	15	0.0933333
5	0	0eq	15	0	1.7	77.5	0.0219355	3	200	0.015							0.0272	0.0106122	0.0162162
6	0	0eq	15	0
7	0	0eq	15	0	4.5	77.5	0.0580645	7.8	100	0.078							0.072	0.146667	0.0917647
8	3	1eq	15	0.2
9	1.1	1eq	15	0.0733333	1.1	77.5	0.0141935	4.5	190	0.0236842							0	0.0302222	0.0194286
10	0	0eq	15	0	3	57.25	0.0524017	10	190	0.0526316							0.0710059	0.0527307	0.0571429
11	5	1eq	15	0.333333
12	2	1eq	15	0.133333
13	3.2	datum	17	0.188235				14	120	0.116667									0.104854
14					50	77.1	0.648508
18	37	datum	17	2.17647
19					297	70	4.24286
20
21					290	94	3.08511
22					250	71	3.52113
23					178	71	2.50704
24					6	77.5	0.0774194
25	0	datum	16	0	6	77.5	0.0774194	25.5	140	0.182143							0.097561	0.312	0.205645
26	70	datum,cluster	13.3	5.26316										56000	8000	7
27	66	datum,cluster	10.65	6.19718
28	55	datum	15	3.66667										9000	3500	2.57143
29											400	850	0.470588
30	6	datum	16.5	0.363636				17	137	0.124088									0.0912863
31	3	datum	14.3	0.20979	9	55	0.163636	40	160	0.25							0.14742	0.295238	0.253946
32					2	77.5	0.0258065	8	200	0.04								0.0489796
33					99	75	1.32
34
35					19	53.6	0.354478	31.4	98.2	0.319756				1370	3000	0.456667		0.278027
36											208.5	510	0.408824	290.5	4960	0.0585685
37	1.8	datum, inferred	15	0.12	6	50	0.12	14	208	0.0673077	46	395	0.116456				0.12	0.0506329	0.0632124
38								2	100	0.02
39	18	datum	10	1.8
40	29.5	datum	12.75	2.31373
41					0	2000	0	0	2000	0	0	2000	0	0	2000	0		0
42					4	77.5	0.0516129
43	6	datum	9.3	0.645161				40	112.9	0.354296				2500	4000	0.625			0.328185
44	3.2	6 eq	15	0.213333	14	60	0.233333	18	130	0.138462							0.24	0.0571429	0.128696
46	0	0eq	15	0	3.7	77.5	0.0477419										0.0592
47	0	0eq	15	0	5.3	77.5	0.0683871										0.0848
48	0.65	1eq	15	0.0433333										1500	4200	0.357143
49	0	0eq	15	0	2.5	77.5	0.0322581	6	200	0.03							0.04	0.0285714	0.0324324
50	3.3	datum	17.4	0.189655
51	2.35	datum, inferred	15	0.156667	15	77.5	0.193548	50	200	0.25	140	500	0.28	440	1470	0.29932	0.2024	0.285714	0.257568
52	2.75	1eq	15	0.183333	8.5	77.5	0.109677	50	175	0.285714	335	630	0.531746				0.092	0.425641	0.295312
53	2.78	1eq	15	0.185333	8.5	65	0.130769	14.5	120	0.120833							0.1144	0.109091	0.111619
54	39	datum	15.5	2.51613
55	1.9	1 eq	15	0.126667	5.6	77.5	0.0722581	13	190	0.0684211							0.0592	0.0657778	0.0634286
56	11.1	datum	12	0.925
57	4.2	1 eq	15	0.28	6.2	77.5	0.08										0.032
58	2.4	1eq	15	0.16
59	0	0 eq	15	0	3.3	77.5	0.0425806	43.4	200	0.217							0.0528	0.327347	0.234595
60	10.5	datum	13.6	0.772059
61	6.1	2eq	15	0.406667
62	7.5	5 eq	15	0.5
65	5.8	2eq	15	0.386667				41	150	0.273333									0.260741
67	3	3 eq	15	0.2
68
69	7	4eq	15	0.466667
70	1	1eq	15	0.0666667				7.3	190	0.0384211									0.036
71	4.6	1eq	15	0.306667
72	1.8	2eq	16.2	0.111111
73	1.3	1eq	15	0.0866667
74	10	datum	20	0.5				60	150	0.4				1950	4000	0.4875			0.384615
75	12	datum	13.5	0.888889
76	12	datum	13.5	0.888889
77	2	1 eq	15	0.133333
78	0.7	1eq	15	0.0466667
79	2.45	1eq	15	0.163333	7.5	75	0.1										0.0841667
80	7.5	datum	10	0.75
81	6	datum	13.3	0.451128
82	1.9	1eq	15	0.126667	3.8	100	0.038	5.7	140	0.0407143							0.0223529	0.0475	0.0304
83	3.3	1eq	15	0.22	6.5	80	0.08125										0.0492308
84			15	0
85	4.15	1 eq	15	0.276667
86	4.4	3eq, minimum	15	0.293333
87	14.4	7eq	15	0.96				30	250	0.12									0.066383
88	14.5	datum	14.5	1				30	135	0.222222				1375	5000	0.275			0.128631
89								12	165	0.0727273
90	9	datum	16.8	0.535714
91	10	datum	16.8	0.595238				27	250	0.108									0.0728988
92	30	datum	17.4	1.72414
93	23.7	datum	17	1.39412
94	0.75	1eq	15	0.05
96														2000	7700	0.25974
97														3000	7700	0.38961
98	0	0eq	15	0	0	72.5	0	1.75	195	0.00897436	65	500	0.13	100	1100	0.0909091	0	0.0142857	0.00972222
99	2	1eq	15	0.133333				11	132.5	0.0830189	100	500	0.2						0.0765957
100	0	0eq	15	0							70	500	0.14	70	1500	0.0466667
101	0	0eq	15	0	0	69	0	2	189	0.010582	6.5	449	0.0144766				0	0.0166667	0.0114943
102	0	datum	15	0
103	0	datum	15	0
105	0.3	1 eq	15	0.02
106	0	datum	15	0	0	2000	0	0	2000	0	0	2000	0	0	2000	0	0	0	0
107											9	400	0.0225
108	0	datum	15	0										5500	7700	0.714286
109	0	datum	15	0				3	150	0.02	18	750	0.024						0.0222222
110	5.5	datum	16.8	0.327381
111	1.5	datum	14	0.107143	64	66	0.969697	210	130	1.61538							1.20192	2.28125	1.79741
112	4	datum	14	0.285714	21	66	0.318182										0.326923
113	0	datum	14	0	45	66	0.681818										0.865385
114	0	datum	14	0	0	66	0	60	130	0.461538							0	0.9375	0.517241
115	22.5	datum	17.8	1.26404				150	130	1.15385	270	750	0.36						1.13636
116	0	datum	15	0				0.2	900	0.000222222									0.000225989
117	0	datum	15	0	0	900	0	0	900	0	0	900	0				0	0	0
118	0	datum	15	0	0	900	0	0	900	0	0	900	0				0	0	0
119	8.2	datum, inferred	15	0.546667	12	66	0.181818	30	138	0.217391							0.0745098	0.25	0.177236
120	0	datum	15	0										225.5	5300	0.0425472
121											6.8	375	0.0181333
122	0	datum	15	0	0	70	0				13.4	440	0.0304545				0
123	0	datum	15	0	0	455	0	0	455	0	0	455	0				0	0	0
125	0	datum	15	0							13	394	0.0329949
126	0	datum	15	0	0	65	0				22	500	0.044				0
128	3.5	datum	15	0.233333
129					1.2	72.5	0.0165517							200	3500	0.0571429
130								3	137	0.0218978	17	755	0.0225166
132	0.8	1eq	15	0.0533333				11.3	100	0.113									0.123529
133	12	inferred	15	0.8
134
135					2	70	0.0285714				7.5	500	0.015
136	17.4	inferred	15	1.16				130	102.5	1.26829									1.28686
138	2	1eq	15	0.133333	7	52.5	0.133333	13.4	200	0.067							0.133333	0.0433898	0.0616216
139	484.5	datum	13.25	36.566
140					20	70	0.285714
141	0.3	1 eq	15	0.02	5.5	73.4	0.0749319										0.0890411
142	0	datum	15	0							9.4	315	0.0298413
143	0	0eq	15	0				3.4	100	0.034									0.04
144
145	5.5	inferred	15	0.366667
146					13.25	48.5	0.273196
147
148	4	inferred	15	0.266667	8.7	77.5	0.112258										0.0752
149	3.5	2eq, minimum	15	0.233333
150	5	datum	14.5	0.344828	7.25	65	0.111538	9.5	105	0.0904762							0.0445545	0.05625	0.0497238
151	14.4	2eq	15	0.96	235	67.5	3.48148										4.2019
152	8	datum	15	0.533333
153	14	datum	20	0.7				82.5	159	0.518868	300	760	0.394737						0.492806
154	2.5	1eq	15	0.166667	5	100	0.05	12	124.5	0.0963855							0.0294118		0.086758
156	9	5 eq	15	0.6										4270	7000	0.61
157														1450	4200	0.345238
158														760	4200	0.180952
159	15.2	datum	11	1.38182				18.3	128	0.142969				67	918	0.0729847			0.0264957
160	16	datum	8	2
161	2.5	datum	15.8	0.158228	98	50.75	1.93103							12500	6000	2.08333	2.73247
162
163	9.5	datum	9.5	1
164	2.7	2eq, minimum	5.7	0.473684
165								10	103	0.0970874
166					23	60	0.383333
167	3.25	datum	19.2	0.169271	13.5	62	0.217742										0.239486
168	7.5	datum	19.5	0.384615				46.5	149.1	0.311871									0.300926
169	6	datum	20	0.3				46	148.3	0.310182									0.311769
451	8	datum	22.5	0.355556							550	760	0.723684
452					20.4	72	0.283333				277.13	760	0.364645
661	3.4	1eq	15	0.226667	6.5	92.7	0.0701187										0.039897
662	2.5	1eq	15	0.166667	5	92.7	0.0539374										0.032175
1041	0	datum	15	0							4.3	449	0.00957684	15	1210	0.0123967
1371	56	datum	20.7	2.70531
1372	68	datum	20.7	3.28502
				* Calculation of the finite displacement slip-rate over 15 ka time window:
			When an offset datum close to 15 ka time is known (from 8 to 22 ka), we divided the offset of the datum (column B) by the age of the datum (column D).
			When no offset datum close to 15 ka time is known, but other datums are avaiblable, we could lineary assess an offset for 15 ka time
			When the paleo-earthquakes record is known, we consider the cumulative displacement of the events younger than 15 ka (Column B), then we divide by 15 ka to obtain the finite slip-rate
