# Supplementary material
Source: publisher figshare collection journal article supplement (https://gsapubs.figshare.com/ndownloader/files/22410099)
Supplement: Supplementary file 1 [file 22410099 › Supplemental References Cited.docx]

# REFERENCES OF THE NEOTECTONIC DATABASE (Supplemental Information, NEOTECTONIC_DATA.xls)

## Journal articles, Open Report, serials, maps

Anderson, R. E., and Bucknam, R. C., 1979, Map of fault scarps in unconsolidated sediments, Richfield 1° x 2° quadrangle, Utahl: U.S. Geological Survey Open-File Report 79-1236, 15 p. pamphlet, 1 sheet, scale 1: 250,000.

Anderson, R. E., Bucknam, R. C., Crone, A. J., Haller, K. M., Machette, M. N., Personius, S. F., Barnhard, T. P., Cecil, M. J., and Dart, R. L., 1995, Characterization of Quaternary and suspected Quaternary faults, regional studies, Nevada and California: U.S. Dept. of the Interior, U.S. Geological Survey, Open-File Report 95-599.

Bacon, S. N., and Pezzopane, S. K.**,** 2007**,** A 25,000-year record of earthquakes on the Owens Valley fault near Lone Pine, California: Implications for recurrence intervals, slip rates, and segmentation models: Geological Society of America Bulletin, v. 119, no. 7-8, p. 823-847, Doi 10.1130/B25879.1

Bateman, P. C.**,** 1965**,** Geology and Tungsten Mineralization of the Bishop District, California: U.S. Geol. Surv. Prof. Pap., v. 470

Beanland, S., and Clark, M. M.**,** 1994**,** The Owens Valley Fault Zone Eastern California and Surface Faulting Associated with the 1872 Earthquake U.S. Geological Survey Bulletin 1982, v. 29

Bell, J. W., Caskey, S. J., Ramelli, A. R., and Guerrieri, L.**,** 2004**,** Pattern and rates of faulting in the central Nevada seismic belt, and paleoseismic evidence for prior beltlike behavior: Bulletin of the Seismological Society of America, v. 94, no. 4, p. 1229-1254, Doi 10.1785/012003226

Bell, J. W., dePolo, C. M., Ramelli, A. R., Sarna-Wojcicki, A. M., and Meyer, C. E.**,** 1999**,** Surface faulting and paleoseismic history of the 1932 Cedar Mountain earthquake area, west-central Nevada, and implications for modern tectonics of the Walker Lane: Geological Society of America Bulletin, v. 111, no. 6, p. 791-807, Doi 10.1130/0016-7606

Berry, M. E.**,** 1997**,** Geomorphic analysis of late Quaternary faulting on Hilton Creek, Round Valley and Coyote warp faults, east-central Sierra Nevada, California, USA: Geomorphology, v. 20, no. 1-2, p. 177-195, Doi 10.1016/S0169-555x(97)00033-0

Bormann, J. M., Surpless, B. E., Caffee, M. W., and Wesnousky, S. G.**,** 2012**,** Holocene Earthquakes and Late Pleistocene Slip-Rate Estimates on the Wassuk Range Fault Zone, Nevada: Bulletin of the Seismological Society of America, v. 102, no. 4, p. 1884-1891, Doi 10.1785/0120110287

Briggs, R. W., and Wesnousky, S. G.**,** 2004**,** Late Pleistocene fault slip rate, earthquake recurrence, and recency of slip along the Pyramid Lake fault zone, northern Walker Lane, United States: Journal of Geophysical Research-Solid Earth, v. 109, no. B8, doi 10.1029/2003jb002717

Briggs, R. W., and Wesnousky, S. G.**,** 2005**,** Late Pleistocene and Holocene paleoearthquake activity of the Olinghouse fault zone, Nevada: Bulletin of the Seismological Society of America, v. 95, no. 4, p. 1301-1313

Brothers, D. S., Kent, G. M., Driscoll, N. W., Smith, S. B., Karlin, R., Dingler, J. A., Harding, A. J., Seitz, G. G., and Babcock, J. M.**,** 2009**,** New constraints on deformation, slip rate, and timing of the most recent earthquake on the West Tahoe–Dollar Point Fault, Lake Tahoe Basin, California: Bulletin of the Seismological Society of America, v. 99, no. 2A, p. 499-519

Bryant, W. A., 1984, Evidence of recent faulting along the Owens Valley, Round Valley, and White Mountains fault zones, Inyo and Mono Counties, l: Calif. Div. Mines Geol. Open-File Rep. OFR84-54SAC, 4 pp.

Bucknam, R. C., and Anderson, R. E., 1979, Map of fault scarps on unconsolidated sediments, Delta 1° x 2° quadrangle, Utahl.

Burbank, D. W., and Whistler, D. P.**,** 1987**,** Temporally Constrained Tectonic Rotations Derived from Magnetostratigraphic Data - Implications for the Initiation of the Garlock Fault, California: Geology, v. 15, no. 12, p. 1172-1175, Doi 10.1130/0091-7613

Burchfiel, B. C., Hodges, K. V., and Royden, L. H.**,** 1987**,** Geology of Panamint Valley - Saline Valley Pull-Apart System, California - Palinspastic Evidence for Low-Angle Geometry of a Neogene Range-Bounding Fault: Journal of Geophysical Research-Solid Earth and Planets, v. 92, no. B10, p. 10422-10426, Doi 10.1029/Jb092ib10p10422

Bursik, M., and Sieh, K.**,** 1989**,** Range Front Faulting and Volcanism in the Mono Basin, Eastern California: Journal of Geophysical Research-Solid Earth and Planets, v. 94, no. B11, p. 15587-15609, Doi 10.1029/Jb094ib11p15587

Camilleri, P. A.**,** 2013**,** Geologic map and structure of the west-central part of the Grant Range, Nye County, Nevada: The Geological Society of America Digital Map and Chart series 14, p. 25

Cashion, W. B., 1961, Geology and fuel resources of the Orderville-Glendale area, Kane County, Utah: U.S. Geological Survey Coal Investigation Map C-49, scale 1:62,500.

Caskey, S. J., Bell, J. W., Ramelli, A. R., and Wesnousky, S. G.**,** 2004**,** Historic surface faulting and paleoseismicity in the area of the 1954 Rainbow Mountain-Stillwater earthquake sequence, central Nevada: Bulletin of the Seismological Society of America, v. 94, no. 4, p. 1255-1275, Doi 10.1785/012003012

Caskey, S. J., Bell, J. W., and Slemmons, D. B.**,** 2000**,** Historical surface faulting and paleoseismology of the central Nevada seismic belt: Field Guides, v. 2, p. 23-44

Clark, M., Harms, K., Lienkaemper, J., Harwood, D., Lajoie, K., Matti, J., Perkins, J., Rymer, M., Sarna-Wojcicki, A., Sharp, R., Sims, J., and Tinsley, J., 1984, Preliminary slip-rate table and map of late-Quaternary faults of California, l: US Department of the Interior, Geological Survey, Open-File Report 84-106.

Colgan, J. P., Howard, K. A., Fleck, R. J., and Wooden, J. L.**,** 2010**,** Rapid middle Miocene extension and unroofing of the southern Ruby Mountains, Nevada: Tectonics, v. 29, no. 6

Colman, S. M., Kelts, K. R., and Dinter, D. A.**,** 2002**,** Depositional history and neotectonics in Great Salt Lake, Utah, from high-resolution seismic stratigraphy: Sedimentary Geology, v. 148, no. 1, p. 61-78

Colman, S. M., and Pierce, K. L.**,** 1986**,** Glacial Sequence near Mccall, Idaho - Weathering Rinds, Soil Development, Morphology, and Other Relative-Age Criteria: Quaternary Research, v. 25, no. 1, p. 25-42, Doi 10.1016/0033-5894

Crone, A. J.**,** 1983**,** Amount of displacement and estimated age of a Holocene surface faulting event, eastern Great Basin, Millard County, Utah: Geologic excursions in neotectonics and engineering geology in Utah; Guidebook, Part IV, p. 49-55

Crone, A. J., and Harding, S. T.**,** 1984**,** Relationship of late Quaternary fault scarps to subjacent faults, eastern Great Basin, Utah: Geology, v. 12, no. 5, p. 292-295

Crone, A. J., and Machette, M. N., 2009, Late Quaternary Faulting on the Eastgate and Clan Alpine Faults, Nevada: U.S. Geological Survey Golden Colorado.

Davies, G. H.**,** 1999**,** Structural geology of the Colorado Plateau region of southern Utah, with special emphasis on deformation bands: Geological Society of America, v. Special Paper 342, p. 157

Dawson, T. E., McGill, S. F., and Rockwell, T. K.**,** 2003**,** Irregular recurrence of paleoearthquakes along the central Garlock fault near El Paso Peaks, California: Journal of Geophysical Research-Solid Earth, v. 108, no. B7, Doi 10.1029/2001jb001744

dePolo, C. M.**,** 1998, A reconnaissance technique for estimating the slip rates of normal-slip faults in the Great Basin, and application to faults in Nevada, USA, University of Nevada.

dePolo, C. M., 2007, Estimating Uncertainties of Seismic Hazard Parameters for Nevada Faults, Formations of a Nevada Quaternary Fault Working Group, and Gaining Consensus Fault Parameters, l: U.S. Geological Survey Earthquake Hazards Reduction Program Final Technical Report 06HQAG0126.

dePolo, C. M., and Anderson, J. G.**,** 2000**,** Estimating the slip rates of normal faults in the Great Basin, USA: Basin Research, v. 12, no. 3-4, p. 227-240, DOI 10.1046/j.1365-2117.2000.00131.x

Dingler, J., Kent, G., Driscoll, N., Babcock, J., Harding, A., Seitz, G., Karlin, B., and Goldman, C.**,** 2009**,** A high-resolution seismic CHIRP investigation of active normal faulting across Lake Tahoe Basin, California-Nevada: Geological Society of America Bulletin, v. 121, no. 7-8, p. 1089-1107

Dinter, D. A., and Pechmann, J. C., 2004a, Segmentation and Holocene displacement history of the East Great Salt Lake fault: Salt Lake City, *in* Lund, W. R., ed., PROCEEDINGS VOLUME BASIN AND RANGE PROVINCE SEISMIC HAZARDS SUMMIT II, Utah Geological Survey.

Dinter, D. A., and Pechmann, J. C.**,** 2004b**,** Holocene segmentation and displacement history of the East Great Salt Lake fault, Utah [ext. abs.]: submitted to Proceedings of the Basin and Range Province Seismic Hazards Summit II, Reno, Nevada, May 16-19, 2004

Dodge, R. L.**,** 1982, Seismic and geomorphic history of the Black Rock fault zone, northwest Nevada: Colorado School of Mines.

Dohrenwend, J. C., Schell, B. A., and Moring, B. C., 1991, Reconnaissance photogeologic map of young faults in the Lund 1° by 2° quadrangle, Nevada and Utah: U.S. Geological Survey Miscellaneous Field Studies Map MF-2180, 1 sheet, scale 1:250,000.

DuRoss, C., Hylland, M., Hiscock, A., Beukelman, G., McDonald, G., Erickson, B., McKean, A., Personius, S. F., Briggs, R. W., Gold, R., Crone, T., Angster, S., King, R., and Mahan, S., 2014, Update on Paleoseismic Trenching of the Nephi Segment, power point presentation, UTAH QUATERNARY FAULT PARAMETERS WORKING GROUP, February 5, 2014, Utah Geological Survey, U.S. Geological Survey.

DuRoss, C., McDonald, G., and Lund, W. R., 2008, Paleoseismic investigation of the northern strand of the Nephi segment of the Wasatch fault zone at Santaquin, Utah, *in* Lund, W. R., ed., Paleoseismology of Utah, Volume 17, Utah Geol. Surv. Spec. Stud. 124, 33 pp.

DuRoss, C., Olig, S., Crone, A. J., Personius, S. F., and Lund, W. R., 2012, Characterizing the central Wasatch Fault Zone for the Working Group on Utah Earthquake Probabilities, UTAH QUATERNARY FAULT PARAMETERS WORKING GROUP, February 15, 2012, Utah geological survey.

DuRoss, C. B.**,** 2008**,** Holocene Vertical Displacement on the Central Segments of the Wasatch Fault Zone, Utah: Bulletin of the Seismological Society of America, v. 98, no. 6, p. 2918-2933, Doi 10.1785/0120080119

DuRoss, C. B., Personius, S. F., Crone, A. J., McDonald, G. N., and Briggs, R. W.**,** 2012, Late Holocene earthquake history of the Brigham City segment of the Wasatch fault zone at the Hansen Canyon, Kotter Canyon, and Pearsons Canyon trench sites, Box Elder County, Utah, Utah Geological Survey.

DuRoss, C. B., Personius, S. F., Crone, A. J., Olig, S. S., and Lund, W. R.**,** 2011**,** Integration of paleoseismic data from multiple sites to develop an objective earthquake chronology: Application to the Weber segment of the Wasatch fault zone, Utah: Bulletin of the Seismological Society of America, v. 101, no. 6, p. 2765-2781

Eisses, A. K., Kell, A., Kent, G. M., Driscoll, N. W., Baskin, R. L., Smith, K. D., Karlin, R. E., Louie, J. N., and Pullammanappallil, S. K.**,** 2015**,** New constraints on fault architecture, slip rates, and strain partitioning beneath Pyramid Lake, Nevada: Geosphere, v. 11, no. 3, p. 683-704

Faulds, J. E., Henry, C. D., and Hinz, N. H.**,** 2005**,** Kinematics of the northern Walker Lane: An incipient transform fault along the Pacific–North American plate boundary: Geology, v. 33, no. 6, p. 505-508

Fenton, C. R., Webb, R. H., Pearthree, P. A., Cerling, T. E., and Poreda, R. J.**,** 2001**,** Displacement rates on the Toroweap and Hurricane faults: Implications for Quaternary downcutting in the Grand Canyon, Arizona: Geology, v. 29, no. 11, p. 1035-1038

Fossett, E.**,** 2005, Paleoseismology of the Black Hills fault, southern Nevada, and implications for regional tectonics [Thesis: University of Nevada, Las Vegas, 103 p.

Foy, T. A., Frankel, K. L., Lifton, Z. M., Johnson, C. W., and Caffee, M. W.**,** 2012**,** Distributed extensional deformation in a zone of right-lateral shear: Implications for geodetic versus geologic rates of deformation in the eastern California shear zone-Walker Lane: Tectonics, v. 31, Doi 10.1029/2011tc002930

Frankel, K. L., Brantley, K. S., Dolan, J. F., Finkel, R. C., Klinger, R. E., Knott, J. R., Machette, M. N., Owen, L. A., Phillips, F. M., Slate, J. L., and Wernicke, B. P.**,** 2007**,** Cosmogenic Be-10 and Cl-36 geochronology of offset alluvial fans along the northern Death Valley fault zone: Implications for transient strain in the eastern California shear zone: Journal of Geophysical Research-Solid Earth, v. 112, no. B6, Doi 10.1029/2006jb004350

Frankel, K. L., Dolan, J. F., Finkel, R. C., Owen, L. A., and Hoeft, J. S.**,** 2007**,** Spatial variations in slip rate along the Death Valley-Fish Lake Valley fault system determined from LiDAR topographic data and cosmogenic Be-10 geochronology: Geophysical Research Letters, v. 34, no. 18, Doi 10.1029/2004gl030549

Frankel, K. L., Dolan, J. F., Owen, L. A., Ganev, P., and Finkel, R. C.**,** 2011**,** Spatial and temporal constancy of seismic strain release along an evolving segment of the Pacific-North America plate boundary: Earth and Planetary Science Letters, v. 304, no. 3-4, p. 565-576, DOI 10.1016/j.epsl.2011.02.034

Friedrich, A. M., Lee, J., Wernicke, B. P., and Sieh, K.**,** 2004**,** Geologic context of geodetic data across a Basin and Range normal fault, Crescent Valley, Nevada: Tectonics, v. 23, no. 2, Doi 10.1029/2003tc001528

Friedrich, A. M., Wernicke, B. P., Niemi, N. A., Bennett, R. A., and Davis, J. L.**,** 2003**,** Comparison of geodetic and geologic data from the Wasatch region, Utah, and implications for the spectral character of Earth deformation at periods of 10 to 10 million years: Journal of Geophysical Research-Solid Earth, v. 108, no. B4, Doi 10.1029/2001jb000682

Fugro National Inc., 1981, MX siting investigation, geotechnical evaluation, verification study—Pine Valley, Utah, Volume I—Synthesis.

Ganev, P. N., Dolan, J. F., Frankel, K. L., and Finkel, R. C.**,** 2010**,** Rates of extension along the Fish Lake Valley fault and transtensional deformation in the Eastern California shear zone-Walker Lane belt: Lithosphere, v. 2, no. 1, p. 33-49, Doi 10.1130/L51.1

Ganev, P. N., Dolan, J. F., McGill, S. F., and Frankel, K. L.**,** 2012**,** Constancy of geologic slip rate along the central Garlock fault: implications for strain accumulation and release in southern California: Geophysical Journal International, v. 190, no. 2, p. 745-760, DOI 10.1111/j.1365-246X.2012.05494.x

Gilbert, C., Christensen, M., Al-Rawi, Y., and Lajoie, K.**,** 1968**,** Structural and volcanic history of Mono basin, California-Nevada: Geological Society of America Memoirs, v. 116, p. 275-330

Gold, R., Briggs, R., Crone, A., and Gosse, J.**,** 2013**,** Late Quaternary Slip‐Rate Variations along the Warm Springs Valley Fault System, Northern Walker Lane, California–Nevada Border: Bulletin of the Seismological Society of America, v. 103, no. 1, p. 542-558

Gold, R. D., Briggs, R. W., Personius, S. F., Crone, A. J., Mahan, S. A., and Angster, S. J.**,** 2014**,** Latest Quaternary paleoseismology and evidence of distributed dextral shear along the Mohawk Valley fault zone, northern Walker Lane, California: Journal of Geophysical Research: Solid Earth, v. 119, no. 6, p. 5014-5032

Guest, B., Niemi, N., and Wernicke, B.**,** 2007**,** Stateline fault system: A new component of the Miocene-Quaternary Eastern California shear zone: Geological Society of America Bulletin, v. 119, no. 11-12, p. 1337-1346, Doi 10.1130/0016-7606(2007)119[1337:Sfsanc]2.0.Co;2

Hamblin, W., Damon, P., and Bull, W.**,** 1981**,** Estimates of vertical crystal strain rates along the western margins of the Colorado Plateau: Geology, v. 9, no. 7, p. 293-298

Hanson, K. L., Swan, F. H., and Schwartz, D. P., 1981, Study of earthquake recurrence intervals on the Wasatch fault, Utahl: Woodward-Clyde Consultants, San Francisco, 22 pp.

Hecker, S.**,** 1993, Quaternary tectonics of Utah with emphasis on earthquake-hazard characterization, Utah Geological Survey, v. 127.

Hedel, C. W.**,** 1980, Late Quaternary faulting in western Surprise Valley, Modoc County, California [M.S. thesis: San Jose State University, San Jose, California, 113 p.

Hedel, C. W., 1984, Maps showing geomorphic and geologic evidence for late Quaternary displacement along the Surprise Valley and associated faults, Modoc County, California: U.S. Geol. Surv. Misc. Field Stud. Map, MF-1429.

Hoeft, J. S., and Frankel, K. L.**,** 2010**,** Temporal variations in extension rate on the Lone Mountain fault and strain distribution in the eastern California shear zone-Walker Lane: Geosphere, v. 6, no. 6, p. 917-936, Doi 10.1130/Ges00603.1

Hoffman, W. R.**,** 2009, Late Pleistocene slip rates along the Panamint Valley fault zone, Eastern California: The Pennsylvania State University.

Hoover, J. D.**,** 1974**,** Periodic Quaternary volcanism in the Black Rock Desert: Brigham Young University Geology Studies, v. 21, p. 3-72

Hylland, M., and Machette, M. N., 2004, Part III – Interim surficial geologic map of the Levan segment of the Wasatch fault zone, Juab and Sanpete Counties, *in* Christenson, G. E., Ashland, F.X., Hylland, M.D., McDonald, G.N., and Case, Bill, ed., Database compilation, coordination of earthquake-hazards mapping, and study of the Wasatch fault and earthquake-induced landslides, Wasatch Front, Utah, Utah Geological Survey Final Contract Report to the U.S. Geological Survey, contract no. 03HGAG0008, 30 p.

Hylland, M. D., DuRoss, C. B., McDonald, G. N., Olig, S. S., Oviatt, C. G., Mahan, S. A., Crone, A. J., and Personius, S. F., 2014, Late Quaternary Paleoseismology of the West Valley Fault Zone—Insights from the Baileys Lake Trench Site, *in* DuRoss, C. B., and Hylland, M. D., eds., Evaluating surface faulting chronologies of graben-bounding faults in Salt Lake Valley, Utah—new paleoseismic data from the Salt Lake City segment of the Wasatch fault zone and the West Valley fault zone.

Jackson, M., 1991, Number and timing of Holocene paleoseismic events on the Nephi and Levan segments, Wasatch fault zone, Utah, *in* Lund, W. R., ed., Paleoseismology of Utah, Volume 3, Utah Geol. Surv. Spec. Stud. 78, p. 23.

Jayko, A.**,** 1990**,** Shallow crustal deformation in the Pahranagat area, southern Nevada: in Wernicke, B. P., ed., Basin and Range extensional tectonics near the latitude of Las Vegas, Nevada: Geological Society of America Memoirs, v. 176, p. 213-236

Keaton, J., Currey, D., and Olig, S.**,** 1987**,** Paleoseismicity and earthquake hazards evaluation of the West Valley fault zone: Salt Lake City urban area, Utah, report, Dames and Moore, Salt Lake City

Kent, G. M., Babcock, J. M., Driscoll, N. W., Harding, A. J., Dingler, J. A., Seitz, G. G., Gardner, J. V., Mayer, L. A., Goldman, C. R., and Heyvaert, A. C.**,** 2005**,** 60 ky record of extension across the western boundary of the Basin and Range province: Estimate of slip rates from offset shoreline terraces and a catastrophic slide beneath Lake Tahoe: Geology, v. 33, no. 5, p. 365-368

Kirby, E., Anandakrishnan, S., Phillips, F., and Marrero, S.**,** 2008**,** Late pleistocene slip rate along the Owens Valley fault, eastern California: Geophysical Research Letters, v. 35, no. 1, Doi 10.1029/2007gl031970

Kirby, E., Burbank, D. W., Reheis, M., and Phillips, F.**,** 2006**,** Temporal variations in slip rate of the White Mountain Fault Zone, Eastern California: Earth and Planetary Science Letters, v. 248, no. 1-2, p. 168-185, DOI 10.1016/j.epsl.2006.05.026

Koehler, R. D., and Wesnousky, S. G.**,** 2011**,** Late Pleistocene regional extension rate derived from earthquake geology of late Quaternary faults across the Great Basin, Nevada, between 38.5 degrees N and 40 degrees N latitude: Geological Society of America Bulletin, v. 123, no. 3-4, p. 631-650, Doi 10.1130/B30111.1

Le, K., Lee, J., Owen, L. A., and Finkel, R.**,** 2007**,** Late quaternary slip rates along the Sierra Nevada frontal fault zone, California: Slip partitioning across the western margin of the Eastern California Shear Zone-Basin and Range Province: Geological Society of America Bulletin, v. 119, no. 1-2, p. 240-256, Doi 10.1130/B25960.1

Lee, J.**,** 1995**,** Rapid Uplift and Rotation of Mylonitic Rocks from beneath a Detachment Fault - Insights from Potassium-Feldspar Ar-40/Ar-39 Thermochronology, Northern Snake Range, Nevada: Tectonics, v. 14, no. 1, p. 54-77, Doi 10.1029/94tc01508

Lee, J., Garwood, J., Stockli, D. F., and Gosse, J.**,** 2009**,** Quaternary faulting in Queen Valley, California-Nevada: Implications for kinematics of fault-slip transfer in the eastern California shear zone-Walker Lane belt: Geological Society of America Bulletin, v. 121, no. 3-4, p. 599-614, Doi 10.1130/B26352.1

Lerch, D. W., Klemperer, S. L., Egger, A. E., Colgan, J. P., and Miller, E. L.**,** 2010**,** The northwestern margin of the Basin-and-Range Province, part 1: Reflection profiling of the moderate-angle (similar to 30 degrees) Surprise Valley Fault: Tectonophysics, v. 488, no. 1-4, p. 143-149, DOI 10.1016/j.tecto.2009.05.028

Loomis, D. P., and Burbank, D. W.**,** 1988**,** The Stratigraphic Evolution of the El-Paso Basin, Southern-California - Implications for the Miocene Development of the Garlock Fault and Uplift of the Sierra-Nevada: Geological Society of America Bulletin, v. 100, no. 1, p. 12-28, Doi 10.1130/0016-7606(1988)100<0012:Tseote>2.3.Co;2

Louie, J., Shields, G., Ichinose, G., Hasting, M., Plank, G., and Bowman, S.**,** 1997**,** Shallow geophysical constraints on displacement and segmentation of the Pahrump Valley fault zone, California-Nevada border: Proceedings of the Basin and Range Province Seismic Hazards Summit

Lund, W. R.**,** 2005, Consensus preferred recurrence-interval and vertical slip-rate estimates: Review of Utah paleoseismic-trenching data by the Utah Quaternary Fault Parameters Working Group, Utah Geological Survey.

Lund, W. R., Hozik, M. J., and Hatfield, S. C.**,** 2007, Paleoseismic Investigation and Long-term Slip History of the Hurricane Fault in Southwestern Utah, Utah Geological Survey.

Lund, W. R., Knudsen, T. R., and Vice, G. S.**,** 2008, Paleoseismic Reconnaissance of the Sevier Fault, Kane and Garfield Counties, Utah, Utah Geological Survey, v. Paleoseismology of Utah, Volume 16.

Lundin, E. R.**,** 1989**,** Thrusting of the Claron Formation, the Bryce Canyon region, Utah: Geological Society of America Bulletin, v. 101, p. p. 1038-1050

Machette, M.**,** 1985**,** Late Cenozoic geology of the Beaver basin, southwestern Utah: Brigham Young University Geology Studies, v. 32, no. pt 1, p. 19-37

Machette, M., Haller, K., Ruleman, C., Mahan, S., and Okumura, K.**,** 2005**,** Geologic Evidence for Late Quaternary Movement on the Clan Alpine Fault West Central Nevada—Trench Logs, Scarp Profiles, Location Maps, and Sample and Soil Descriptions: US Geological Survey Scientific Investigations Map 2891

Machette, M. N., 1984, Preliminary investigations of late Quaternary slip rates along the southern part of the Wasatch fault zone, central Utah, *in* Hays, W. W., and Gori, P. A., eds., Proceedings of Conference XXVI; A Workshop on Evaluation of Regional and Urban Earthquake Hazards and Risk in Utah, Conference XXVI, U.S. Geol. Surv. Prof. Pap., 1275, 391– 406.

Machette, M. N., 1985, Calcic soils of the southwestern United States, *in* Weide, D. L., ed., Soils and Quaternary geology of the southwestern United States, Geological Society of America Special Paper 203, p. 1-21.

Machette, M. N., 1992, Surficial geologic map of the Wasatch fault zone, eastern Utah Valley, Utah County and parts of Salt Lake and Juab Counties, Utah: U.S. Geological Survey Miscellaneous Investigations Series Map I-2095, scale 1:50,000.

Machette, M. N., Personius, S. F., and Nelson, A. R., 1992, Paleoseismology of the Wasatch fault zone: a summary of recent investigations, conclusions, and interpretations, *in* Gori, P. A., and Hays, W. W., eds., Assessement of Regional Earthquake Hazards and Risk Along the Wasatch Front, Utah, U.S. Geol. Surv. Prof. Pap, 1500, A1-A71.

Madsen, D. B., and Currey, D. R.**,** 1979**,** Late Quaternary Glacial and Vegetation Changes, Little Cottonwood Canyon Area, Wasatch Mountains, Utah: Quaternary Research, v. 12, no. 2, p. 254-270, Doi 10.1016/0033-5894(79)90061-9

Mattson, A., and Bruhn, R. L.**,** 2001**,** Fault slip rates and initiation age based on diffusion equation modeling: Wasatch Fault Zone and eastern Great Basin: Journal of Geophysical Research-Solid Earth, v. 106, no. B7, p. 13739-13750, Doi 10.1029/2001jb900003

McCalpin, J. P., Forman, S. L., and Lowe, M.**,** 1994**,** Reevaluation of Holocene faulting at the Kaysville site, Weber segment of the Wasatch fault zone, Utah: Tectonics, v. 13, no. 1, p. 1-16, 10.1029/93TC02067

McCalpin, J. P., Robison, R. M., and Garr, J. D.**,** 1992**,** Neotectonics of the Hansel Valley-Pocatello Valley corridor, northern Utah and southern Idaho: Assessment of regional earthquake hazards and risk along the Wasatch Front, Utah: US Geological Survey Professional Paper, v. 1500, p. G1-G18

Mcgill, S. F., and Sieh, K.**,** 1991**,** Surficial Offsets on the Central and Eastern Garlock Fault Associated with Prehistoric Earthquakes: Journal of Geophysical Research-Solid Earth, v. 96, no. B13, p. 21597-21621, Doi 10.1029/91jb02030

McGill, S. F., Wells, S. G., Fortner, S. K., Kuzma, H. A., and Mcgij, J. D.**,** 2009**,** Slip rate of the western Garlock fault, at Clark Wash, near Lone Tree Canyon, Mojave Desert, California: Geological Society of America Bulletin, v. 121, no. 3-4, p. 536-554, Doi 10.1130/B26123.1

Miller, E. L., Dumitru, T. A., Brown, R. W., and Gans, P. B.**,** 1999**,** Rapid Miocene slip on the Snake Range-Deep Creek Range fault system, east-central Nevada: Geological Society of America Bulletin, v. 111, no. 6, p. 886-905, Doi 10.1130/0016-7606(1999)111<0886:Rmsots>2.3.Co;2

Nelson, A. R., Lowe, M., Personius, S. F., Bradley, L. A., Forman, S. L., Klauk, R., and Garr, J., 2006, Holocene earthquake history of the northern Weber segment of the Wasatch fault zone, Utah, *in* Lund, W. R., ed., Paleoseismology of Utah, vol. 13, Volume Utah Geol. Surv. Misc. Pub. 05-8, p. 39 pp.

Niemi, N. A., Wernicke, B. P., Friedrich, A. M., Simons, M., Bennett, R. A., and Davis, J. L.**,** 2004**,** BARGEN continuous GPS data across the eastern Basin and Range province, and implications for fault system dynamics: Geophysical Journal International, v. 159, no. 3, p. 842-862, DOI 10.1111/j.1365-246X.2004.02454.x

Olig, S. S., Lund, W. R., and Black, B. D.**,** 1994**,** Large mid-Holocene and Late Pleistocene Earthquakes on the Oquirrh Fault Zone, Utah: Geomorphology, v. 10, no. 1-4, p. 285-315, Doi 10.1016/0169-555x(94)90022-1

Oswald, J. A., and Wesnousky, S. G.**,** 2002**,** Neotectonics and Quaternary geology of the Hunter Mountain fault zone and Saline Valley region, southeastern California: Geomorphology, v. 42, no. 3-4, p. 255-278, Doi 10.1016/S0169-555x(01)00089-7

Oviatt, C. G., 1992, Quaternary geology of the Scipio Valley area, Millard and Juab Counties, Utah.

Parry, W. T., and Bruhn, R. L.**,** 1987**,** Fluid Inclusion Evidence for Minimum 11-Km Vertical Offset on the Wasatch Fault, Utah: Geology, v. 15, no. 1, p. 67-70, Doi 10.1130/0091-7613(1987)15<67:Fiefmk>2.0.Co;2

Pearthree, P. A., 1998, Quaternary fault data and map for Arizona, l: Arizona Geological Survey, Open-File Report 98-24, 122p., one plate in pocket scale 1:750,000, 1.4 Mb disk.

Pearthree, P. A., and Wallace, T. C.**,** 1992**,** The St. George earthquake of September 2, 1992: Arizona Geology, v. 22, no. 7-8

Personius, S. F., Crone, A. J., Machette, M. N., Lidke, D. J., Bradley, L. A., and Mahan, S., 2007, Logs and scarp data from a paleoseismic investigation of the Surprise Valley fault zone, Modoc County, California: U.S. Geol. Surv. Sci. Invest. Map, 2983.

Personius, S. F., Crone, A. J., Machette, M. N., Mahan, S. A., Kyung, J. B., Cisneros, H., and Lidke, D. J.**,** 2007**,** Late quaternary paleoseismology of the southern Steens fault zone, northern Nevada: Bulletin of the Seismological Society of America, v. 97, no. 5, p. 1662-1678, Doi 10.1785/0120060202

Personius, S. F., Crone, A. J., Machette, M. N., Mahan, S. A., and Lidke, D. J.**,** 2009**,** Moderate rates of late Quaternary slip along the northwestern margin of the Basin and Range Province, Surprise Valley fault, northeastern California: Journal of Geophysical Research-Solid Earth, v. 114, Doi 10.1029/2008jb006164

Personius, S. F., and Geological, U., 1991, Paleoseismic analysis of the Wasatch fault zone at the Brigham City trench site, Brigham City, Utah and Pole Patch trench site, Pleasant View, Utah, *in* Lund, W. R., ed., Paleoseismology of Utah, Volume 2, Utah geological and mineral survey study 76, p. 39.

Personius, S. F., and Mahan, S. A.**,** 2005**,** Unusually low rates of slip on the Santa Rosa Range fault zone, northern Nevada: Bulletin of the Seismological Society of America, v. 95, no. 1, p. 319-333

Pierce, K. L., and Colman, S. M.**,** 1986**,** Effect of Height and Orientation (Microclimate) on Geomorphic Degradation Rates and Processes, Late-Glacial Terrace Scarps in Central Idaho: Geological Society of America Bulletin, v. 97, no. 7, p. 869-885, Doi 10.1130/0016-7606

Piety, L. A., 1994, Compilation of known and suspected Quaternary faults within 100 km of Yucca Mountain, Nevada and California.

Planke, S., and Smith, R. B.**,** 1991**,** Cenozoic extension and evolution of the Sevier Desert basin, Utah, from seismic reflection, gravity, and well log data: Tectonics, v. 10, no. 2, p. 345-365

Ramelli, A., and DePolo, C., 1993, Examples of Holocene and latest Pleistocene faulting in northern and eastern Nevada, Geological Society of America, Abstracts with Programs, Volume 25: United States.

Ramelli, A. R., Bell, J. W., dePolo, C. M., and Yount, J. C.**,** 1999**,** Large-magnitude, Late Holocene earthquakes on the Genoa fault, west-central Nevada and eastern California: Bulletin of the Seismological Society of America, v. 89, no. 6, p. 1458-1472

Ramelli, A. R., DePolo, C. M., and Bell, J. W., 2002, Paleoseismic studies of the Peavine Peak fault.

Redwine, J.**,** 2003, Quaternary pluvial history and paleoclimatic implications of Newark Valley, east-central Nevada: MS thesis. Humboldt State University, Arcata, California.

Rood, D. H., Burbank, D. W., and Finkel, R. C.**,** 2011**,** Spatiotemporal patterns of fault slip rates across the Central Sierra Nevada frontal fault zone: Earth and Planetary Science Letters, v. 301, no. 3, p. 457-468

Sarmiento, A. C., Wesnousky, S. G., and Bormann, J. M.**,** 2011**,** Paleoseismic Trenches across the Sierra Nevada and Carson Range Fronts in Antelope Valley, California, and Reno, Nevada: Bulletin of the Seismological Society of America, v. 101, no. 5, p. 2542-2549, Doi 10.1785/0120100176

Sawyer, T. L., Briggs, R. W., and Ramelli, A. R., 2013, Paleoseismic investigation of the Mohawk Valley fault zone, Sierra County, northeastern California: Final Technical Report 04HQGR0089, U.S. Geological Survey, National Earthquake Hazards Reduction Program.

Schell, B. A.**,** 1981**,** Faults and lineaments in the MX Sitting Region, Nevada and Utah: Technical report to U.S. Department of [Defense] the Air Force, Norton Air Force Base, California, under Contract FO4704-80-C-0006, v. 1, p. 77

Schiefelbein, I. M.**,** 2002, Fault segmentation, fault linkage, and hazards along the Sevier fault, southwestern Utah [M.S. thesis: University of Nevada at Las Vegas, 134p., 135 plates p.

Schwartz, D., and Lund, W., 1988, Paleoseismicity and earthquake recurrence at Little Cottonwood Canyon, Wasatch fault zone, Utah, *in* Machette, M. N., ed., In the Footsteps of GK Gilbert; Lake Bonneville and Neotectonics of the Eastern Basin and Range Province: Geological Society of America Guidebook for Field Trip Twelve, Misc. Publ. 88-1, Utah Geol. and Mineral. Surv., Salt Lake City, p. 82-85.

Scott, W. E., Mccoy, W. D., Shroba, R. R., and Rubin, M.**,** 1983**,** Reinterpretation of the Exposed Record of the Last 2 Cycles of Lake Bonneville, Western United-States: Quaternary Research, v. 20, no. 3, p. 261-285, Doi 10.1016/0033-5894(83)90013-3

Scott, W. E., and Shroba, R.**,** 1985, Surficial geologic map of an area along the Wasatch fault zone in the Salt Lake valley, Utah, US Department of the Interior, Geological Survey.

Sieh, K. E., and Jahns, R. H.**,** 1984**,** Holocene Activity of the San-Andreas Fault at Wallace-Creek, California: Geological Society of America Bulletin, v. 95, no. 8, p. 883-896, Doi 10.1130/0016-7606

Slosson, J. E.**,** 1974**,** Surprise Valley fault: Calif. Geol., v. 27, p. 267-270

Smith, K., Pechmann, J., Meremonte, M., and Pankow, K.**,** 2011**,** Preliminary analysis of the Mw 6.0 Wells, Nevada, earthquake sequence: Nevada Bureau of Mines and Geology Special Publication 36, p. 127-145

Sohn, M. F., Knott, J. R., and Mahan, S. A.**,** 2014**,** Paleoseismology of the Southern Section of the Black Mountains and Southern Death Valley Fault Zones, Death Valley, United States: Environmental & Engineering Geoscience, v. 20, no. 2, p. 177-197

Stenner, H. D., Lund, W. R., Pearthree, P. A., and Everitt, B. L.**,** 1999, Paleoseismologic investigations of the Hurricane fault in northwestern Arizona and southwestern Utah, Arizona Geological Survey.

Stockli, D. F., Dumitru, T. A., McWilliams, M. O., and Farley, K. A.**,** 2003**,** Cenozoic tectonic evolution of the White Mountains, California and Nevada: Geological Society of America Bulletin, v. 115, no. 7, p. 788-816, Doi 10.1130/0016-7606

Stockli, D. F., Linn, J. K., Walker, J. D., and Dumitru, T. A.**,** 2001**,** Miocene unroofing of the Canyon Range during extension along the Sevier Desert Detachment, west central Utah: Tectonics, v. 20, no. 3, p. 289-307

Stockli, D. F., Surpless, B. E., Dumitru, T. A., and Farley, K. A.**,** 2002**,** Thermochronological constraints on the timing and magnitude of Miocene and Pliocene extension in the central Wassuk Range, western Nevada: Tectonics, v. 21, no. 4, Doi 10.1029/2001tc001295

Swadley, W. C., 1995, Map showing modern fissures and Quaternary faults in the Dry Lake Valley area, Lincoln County, Nevada: U.S. Geological Survey Miscellaneous Investigations Map I-2501, 1 sheet.

Swadley, W. C., and Simonds, W. F., 1994, Geologic map of the Pahroc Spring NE quadrangle, Lincoln County, Nevada: U.S. Geological Survey Geologic quadrangle Map GQ-1746, 1 sheet, scale 1:24,000.

Swan, F. H., Hanson, K. L., Schwartz, D. P., and Knuepfer, P. L., 1981, Study of earthquake recurrence intervals on the Wasatch fault, Utah - Little Cottonwood Canyon sitel: U.S. Geological Survey Open-File Report 81-450, 30 p.

Swan, F. H., Hanson, K. L., Youngs, R. R., and Angell, M. M., 2004, Paleoseismic Investigations of the Stansbury and Mid-Valley Faults, Skull Valley, Utah, *in* Lund, W. R., ed., PROCEEDINGS VOLUME BASIN AND RANGE PROVINCE SEISMIC HAZARDS SUMMIT II.

Swan, F. H., Schwartz, D. P., and Cluff, L. S.**,** 1980**,** Recurrence of Moderate to Large Magnitude Earthquakes Produced by Surface Faulting on the Wasatch Fault Zone, Utah: Bulletin of the Seismological Society of America, v. 70, no. 5, p. 1431-1462

Turner, R., Koehler, R. D., Briggs, R. W., and Wesnousky, S. G.**,** 2008**,** Paleoseismic and slip-rate observations along the Honey Lake fault zone, northeastern California, USA: Bulletin of the Seismological Society of America, v. 98, no. 4, p. 1730-1736

Von Tish, D. B., Allmendinger, R. W., and Sharp, J. W.**,** 1985**,** History of Cenozoic extension in central Sevier Desert, west-central Utah, from COCORP seismic reflection data: AAPG bulletin, v. 69, no. 7, p. 1077-1087

Wallace, R. E., and Whitney, R. A.**,** 1984**,** Late Quaternary history of the Stillwater seismic gap, Nevada: Bulletin of the Seismological Society of America, v. 74, no. 1, p. 301-314

Wesnousky, S. G.**,** 2005**,** Active faulting in the Walker Lane: Tectonics, v. 24, no. 3, Doi 10.1029/2004tc001645

Wesnousky, S. G., Barron, A. D., Briggs, R. W., Caskey, S. J., Kumar, S., and Owen, L.**,** 2005**,** Paleoseismic transect across the northern Great Basin: Journal of Geophysical Research-Solid Earth, v. 110, no. B5, Doi 10.1029/2004jb003283

Wesnousky, S. G., and Caffee, M.**,** 2011**,** Range-Bounding Normal Fault of Smith Valley, Nevada: Limits on Age of Last Surface-Rupture Earthquake and Late Pleistocene Rate of Displacement: Bulletin of the Seismological Society of America, v. 101, no. 3, p. 1431-1437, Doi 10.1785/0120100238

Wesnousky, S. G., and Owen, L., 2015, Cosmogenic and OSL Dating for Determining Slip Rates of Normal Faults Near Reno: Collaborative Research with University of Nevada, Reno and University of Cincinnati: Final Technical Report G14AP00048 and G14AP00053.

Wesnousky, S. G., and Willoughby, C. H.**,** 2003**,** Neotectonic Note: The Ruby–East Humboldt Range, Northeastern Nevada: Bulletin of the Seismological Society of America, v. 93, no. 3, p. 1345-1354

West, M. W.**,** 1992**,** An Integrated Model for Seismogenesis in the Intermountain Seismic Belt: Bulletin of the Seismological Society of America, v. 82, no. 3, p. 1350-1372

Wills, C. J., and Borchardt, G.**,** 1993**,** Holocene slip rate and earthquake recurrence on the Honey Lake fault zone, northeastern California: Geology, v. 21, no. 9, p. 853-856

Zhang, P. Z., Ellis, M., Slemmons, D. B., and Mao, F. Y.**,** 1990**,** Right-Lateral Displacements and the Holocene Slip Rate Associated with Prehistoric Earthquakes Along the Southern Panamint Valley Fault Zone - Implications for Southern Basin and Range Tectonics and Coastal California Deformation: Journal of Geophysical Research-Solid Earth and Planets, v. 95, no. B4, p. 4857-4872, Doi 10.1029/Jb095ib04p04857

## Data from the U.S. Geological Survey, 2006, Quaternary fault and fold database for the United States.

Adams, K., and Sawyer, T.L., compilers, 1998, Fault number 1601, Bonham Ranch fault zone, in Quaternary fault and fold database of the United States: U.S. Geological Survey website, http://earthquakes.usgs.gov/hazards/qfaults, accessed 07/24/2015 03:37 PM.

Anderson, R.E., compiler, 1998, Fault number 1063, Carp Road fault, in Quaternary fault and fold database of the United States: U.S. Geological Survey website, http://earthquakes.usgs.gov/hazards/qfaults, accessed 07/24/2015 02:48 PM.

Anderson, R.E., compiler, 1998, Fault number 1081, Yucca Mountain faults, western group, in Quaternary fault and fold database of the United States: U.S. Geological Survey website, http://earthquakes.usgs.gov/hazards/qfaults, accessed 07/24/2015 03:34 PM.

Anderson, R.E., compiler, 1999, Fault number 1115, Sheep Basin fault, in Quaternary fault and fold database of the United States: U.S. Geological Survey website, http://earthquakes.usgs.gov/hazards/qfaults, accessed 07/24/2015 03:09 PM.

Anderson, R.E., compiler, 1999, Fault number 1122, Maynard Lake fault, in Quaternary fault and fold database of the United States: U.S. Geological Survey website, http://earthquakes.usgs.gov/hazards/qfaults, accessed 07/24/2015 02:51 PM.

Anderson, R.E., compiler, 1999, Fault number 1123, Kane Spring Wash fault, in Quaternary fault and fold database of the United States: U.S. Geological Survey website, http://earthquakes.usgs.gov/hazards/qfaults, accessed 07/24/2015 02:39 PM.

Anderson, R.E., compiler, 1999, Fault number 1125, West Dry Lake fault, in Quaternary fault and fold database of the United States: U.S. Geological Survey website, http://earthquakes.usgs.gov/hazards/qfaults, accessed 07/24/2015 06:05 PM

Anderson, R.E., compiler, 1999, Fault number 1132, Penoyer fault, in Quaternary fault and fold database of the United States: U.S. Geological Survey website, http://earthquakes.usgs.gov/hazards/qfaults, accessed 07/24/2015 03:05 PM.

Black, B.D., and DuRoss, C.B., and McDonald, G.N., and Pearthree, P.A., and Hecker, S., compilers, 2004, Fault number 1004a, Washington fault zone, northern section, in Quaternary fault and fold database of the United States: U.S. Geological Survey website, http://earthquakes.usgs.gov/hazards/qfaults, accessed 07/24/2015 03:15 PM.

Black, B.D., and Hecker, S., compilers, 1999, Fault number 2409, Utah Lake faults, in Quaternary fault and fold database of the United States: U.S. Geological Survey website, http://earthquakes.usgs.gov/hazards/qfaults, accessed 07/24/2015 03:11 PM.

Black, B.D., and Hecker, S., compilers, 1999, Fault number 2485, Wah Wah Mountains (south end near Lund) fault

, in Quaternary fault and fold database of the United States: U.S. Geological Survey website, http://earthquakes.usgs.gov/hazards/qfaults, accessed 07/24/2015 03:24 PM.

Black, B.D., and Hecker, S., compilers, 1999, Fault number 2489, Mineral Mountains (west side) faults, in Quaternary fault and fold database of the United States: U.S. Geological Survey website, http://earthquakes.usgs.gov/hazards/qfaults, accessed 07/24/2015 02:55 PM.

Pearthree, P.A., compiler, 1997, Fault number 1007, Mesquite fault, in Quaternary fault and fold database of the United States: U.S. Geological Survey website, http://earthquakes.usgs.gov/hazards/qfaults, accessed 07/24/2015 02:54 PM.

Personius, S.F., compiler, 2002, Fault number 856b, Steens fault zone, Mann Lake section, in Quaternary fault and fold database of the United States: U.S. Geological Survey website, http://earthquakes.usgs.gov/hazards/qfaults, accessed 07/24/2015 03:22 PM.

Rowley, P.C., and Anderson, R.E., compilers, 2000, Fault number 1718, Ruby Valley fault zone, in Quaternary fault and fold database of the United States: U.S. Geological Survey website, http://earthquakes.usgs.gov/hazards/qfaults, accessed 07/24/2015 03:07 PM.

Sawyer, T.L., and Adams, K., compilers, 1998, Fault number 1485, Black Rock fault zone, in Quaternary fault and fold database of the United States: U.S. Geological Survey website, http://earthquakes.usgs.gov/hazards/qfaults, accessed 07/24/2015 03:35 PM.

Sawyer, T.L., and Lidke, D.J., compilers, 2000, Fault number 1349, Eastern Monitor Range fault zone, in Quaternary fault and fold database of the United States: U.S. Geological Survey website, http://earthquakes.usgs.gov/hazards/qfaults, accessed 07/24/2015 03:03 PM.

Sawyer, T.L., and Redsteer, M.H., compilers, 1998, Fault number 1398, White River Valley fault zone, in Quaternary fault and fold database of the United States: U.S. Geological Survey website, http://earthquakes.usgs.gov/hazards/qfaults, accessed 07/24/2015 03:27 PM.

Sawyer, T.L., compiler, 1995, Fault number 45, Round Valley fault, in Quaternary fault and fold database of the United States: U.S. Geological Survey website, http://earthquakes.usgs.gov/hazards/qfaults, accessed 07/24/2015 03:42 PM.
